# Supplementary material for: Intracellular location matters: rationalization of the anti-inflammatory activity of a manganese(ii) superoxide dismutase mimic complex
Source: Royal Society of Chemistry journal article supplement (doi:10.1039/d0cc03398g), 2020-01-01
Supplement: d0cc03398g1.pdf [file d0cc03398g1.pdf]

## Supplementary Information

### Intracellular location matters: Rationalization of the anti-inflammatory activity of a manganese (II) superoxide dismutase mimic complex

Emilie Mathieu<sup>a</sup>, Anne-Sophie Bernard<sup>a</sup>, Elodie Quévrain<sup>a</sup>, Martha Zoumpoulaki<sup>a</sup>, Sébastien Iriart<sup>a</sup>, Caroline Lung-Soong<sup>a</sup>, Barry Lai<sup>b</sup>, Kadda Medjoubi<sup>c</sup>, Lucas Henry<sup>a</sup>, Sounderya Nagarajan<sup>d,e</sup>, Florent Poyer<sup>d,e</sup>, Andreas Scheitler<sup>f</sup>, Ivana Ivanović-Burmazović<sup>f</sup>, Sergio Marco<sup>d,e</sup>, Andrea Somogyi<sup>c</sup>, Philippe Seksik<sup>g</sup>, Nicolas Delsuc<sup>a</sup> and Clotilde Policar<sup>\*a</sup>

(a) *Laboratoire des biomolécules, LBM, Département de chimie, Ecole normale supérieure, PSL University, Sorbonne université, CNRS, 75005 Paris, France. E-mail: [clotilde.policar@ens.fr](mailto:clotilde.policar@ens.fr)*

(b) *X-ray Science Division, Argonne National Laboratory, Argonne, Illinois 60439, United States.*

(c) *Synchrotron SOLEIL, BP 48, Saint-Aubin, 91192 Gif sur Yvette, France*

(d) *Institut Curie, Research Center, PSL University, Chemistry, Modelling and Imaging for Biology (CMIB), Bât 110-112, Centre Universitaire, F-910405 Orsay, France*

(e) *INSERM U 1196, CNRS UMR 9187, Paris-Saclay University, Paris-Sud University, University Centre, Orsay, France*

(f) *Department of Chemistry and Pharmacy, University of Erlangen-Nürnberg, Egerlandstr. 1, 91058 Erlangen, Germany*

(g) *Sorbonne Université, Ecole normale supérieure, PSL University, CNRS, INSERM, AP-HP, Laboratoire des biomolécules, LBM 75012 Paris, France*

1. **Materials**
2. **Supplementary Figures**
3. **Determination of the intrinsic activity (Fridovich assay and stopped-flow)**
4. **Synthesis of L2**
5. **Synthesis of L1**
6. **Preparation of the complexes and UV-visible titration**
7. **Characterization of 1**
8. **Experiments on HT29-MD2 cells**
  - Cell culture
  - Cytotoxicity assay
  - Distribution, and quantification experiments
    - Quantification of Mn-complexes by EPR in cell lysates*
    - Comparison of EPR and ICP-MS quantification*
    - Quantification of Mn-complexes by ICP-MS in mitochondria-enriched fractions*
    - Infra-red (IR) imaging of 1*
    - Synchrotron radiation X-ray fluorescence microscopy*
  - Evaluation of the biological activity of Mn<sup>2+</sup>-complexes**
9. **Supplementary Information References**

## 1. Materials

NMR spectra ( $^1\text{H}$  and  $^{13}\text{C}$ ) were recorded on a Bruker DRX300 spectrometer using solvent residual peaks as internal standard. High-resolution mass spectrometry (HRMS) was obtained on a Bruker hybride APEX spectrometer (electrospray) at the ICMMO (Orsay) or on a LTQ FTICR Thermo electron ionization source ESI. UV-visible spectra were recorded on a Varian Cary 300 Bio spectrophotometer, luminescence emission spectra on a Jasco FP-8300 spectrofluorimeter, and infrared spectra and spectral images on a Cary 620 infrared microscope equipped with a 64x64 pixels Stingray MCT detector coupled to a Cary 660 spectrometer equipped with a KBr beamsplitter and a Michelson interferometer. Electrochemistry experiments were performed using an MethrOhm potentiostat (AUTOLAB), and a saturated-calomel reference electrode, glassy carbon working electrode, and a platinum wire counter-electrode from Bio-logic Science instruments (Seysinet-Pariset, France). Analytical HPLC measurements were run on a Dionex Ultimate 3000 instrument using C18 ACE® column (250 × 4.5 mm) packed with spherical 5 μm particles of 300 Å pore size at 1 mL.min<sup>-1</sup>. Preparative HPLC consisted of a dual wavelength UV-Vis absorbance detector (Waters 2487) and a *Waters 600 preparative* pump. Purification of crude product was achieved with a C18 Nucleodur® preparative column (250 × 16 mm, 5 μm particles of 300 Å pore size). Experiments were carried out at a flow rate of 14 mL min<sup>-1</sup> at room temperature. ICP-MS analyses were performed on an Agilent 7700 X. EPR experiments were performed on a Bruker Elexsys 500 spectrometer (Bruker, Wissembourg, France). Fluorescence imaging was performed using an Olympus X71 microscope equipped with a C9100-02 camera (Hamamatsu Corporation, Sewickley, PA), a X60 objective and a Hg lamp (1000W) attenuated by a neutral density filter (ND-1), and confocal fluorescence imaging using a Leica SP5 Confocal laser scanning microscope. X-fluorescence spectromicroscopy samples were manually plunge-frozen using a Leica EM-CPC. Western blot were performed using a capillary-based, automated western blotting system (WES, ProteinSimple, Santa Clara, USA). Stopped-flow measurements were performed on a Biologic SFM-400 four syringe stopped-flow system using only the first three syringes and a Berger Ball mixer to minimize mixing effects between aqueous buffered solutions and DMSO solutions of KO<sub>2</sub>. A J&M TIDAS S MMS UV/VIS diode array detector (integration time 0.5 ms, 180 nm–720 nm wavelength) and an Energetiq LDLS ENQ EQ-99-FC laser driven light source were used. The ratio between buffer and DMSO solution was kept constant at 9:1. Superoxide solutions were prepared by suspending 220–240 mg KO<sub>2</sub> in 20 mL dry DMSO. The suspension was stirred for at least 30 min under inert atmosphere before the suspension was filtered through a PTFE syringe filter (Ø = 0.45 μm) to give a saturated KO<sub>2</sub> solution, which was transferred to the stopped flow setup. The buffers were prepared from commercial available 4-Morpholinepropanesulfonic acid and Sodium dihydrogen phosphate salts. Buffer concentration was 60 mM and ionic strength was set to 150 mM for each buffer by addition of NaCl. Millipore water was used for all buffer solutions and all buffers were treated with Chelex® 100 chelating resin for at least 24 h before use.

Chemicals and solvents were purchased from commercial sources (Sigma-Aldrich, Alfa-Aesa, Strem, Acros, Iris). LPS (Escherichia coli O55:B5), NADH, NBT, TEMED, riboflavin and pyruvic acid were purchased from Sigma Aldrich (Saint-Quentin Fallavier, France). IL8 detection ELISA kit (Duoset) was provided by R&D Systems (Minneapolis, Minnesota, USA). Mouse monoclonal anti-human COX2, rabbit polyclonal anti-human SOD2 (MnSOD), were from Santa Cruz Biotechnology (Dallas, Texas, USA). BCA and BSA were from Uptima-Interchim (Montluçon, France). Detection ECL system and nitrocellulose membranes were from Amersham Biosciences (Piscataway, New Jersey, USA). Dulbecco's modified Eagle medium (DMEM), and blasticidin, were from Invitrogen (Thermo Fisher Scientific, Waltham, Massachusetts, USA). Fetal bovine serum was from GE Healthcare Life Sciences (South Logan, Utah, USA). HEPES buffer solution (1M), EDTA solution (0.5 M), and Dulbecco's phosphate Buffered Saline (10X, DPBS) were from Gibco (Thermo Fisher Scientific, Waltham, Massachusetts, USA). The protease inhibitor cocktail was from Roche Diagnostics (Meylan, France). Acrylamide-bis-acrylamide was from Q-Biogene (Carlsbad, California, USA). WES reagents were from Protein Simple, rabbit polyclonal anti-actin used for WES was from NOVUS (NB600-50399). Silicon nitride windows were purchased from Agar Scientific.

## 2. Supplementary Figures

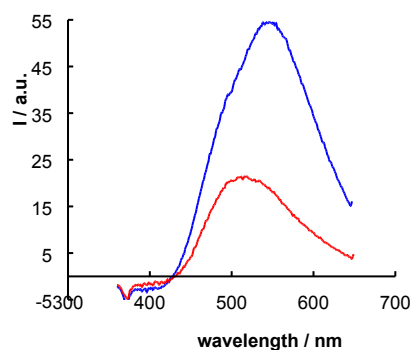

**Figure S1 – Emission spectra of L1 (blue) and 1 (red).** Spectra of L1 and 1 (100  $\mu\text{M}$ , 0.02% DMSO) were recorded in HEPES buffer (0.1 M, pH 7.5), with an excitation wavelength of 330 nm.

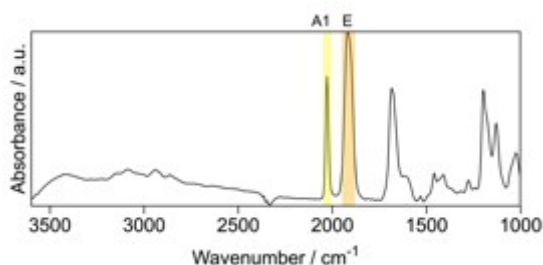

**Figure S2 – Infra-red (IR) absorption spectrum of L1.** IR-spectrum of L1 (10 mM, 2%DMSO) in HEPES buffer (0.1 M, pH 7.5) was deposited on a  $\text{CaF}_2$  membrane and air-dried before measurement. The A1 and E-bands specific of carbonyl moieties are indicated.

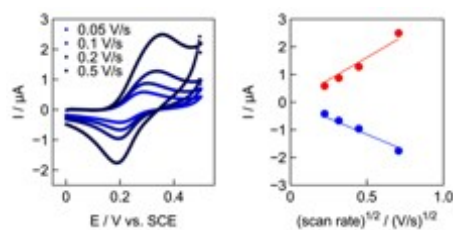

**Figure S3 – Cyclic voltammograms (CV) of 1 at varying scan rates, and plots of peak current intensities versus square root of scan rate, and peak potentials versus log of scan rate.** CV of 1 (100  $\mu\text{M}$ , 0.02% DMSO) in HEPES (100 mM, pH 7.5, RT) were recorded at a glassy carbon disk electrode (3 mm) at varying scan rates. Reference electrode, SCE; counter electrode, Pt wire. The capacitive current was subtracted for each voltammogram. Peak current intensities were plot versus  $(\text{scan rate})^{1/2}$  and vary linearly, which assess that the electron transfer is heterogeneous.

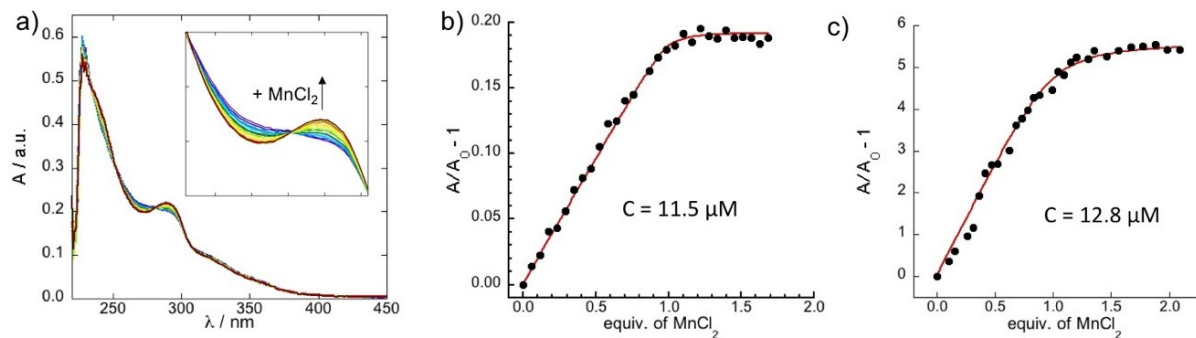

**Figure S4 – (a) UV-visible titration of L1 with  $\text{MnCl}_2$  (b) Determination of the dissociation constant. L1 (11,5  $\mu\text{M}$  0.02% DMSO) in HEPES (50 mM, pH 7.5, 25°C), compared with (c) the determination of the dissociation constants for L2 with  $\text{MnCl}_2$  (12.8  $\mu\text{M}$ ) in HEPES (50 mM, pH 7.5, 25°C), see §7 for details in the simulation procedure.**

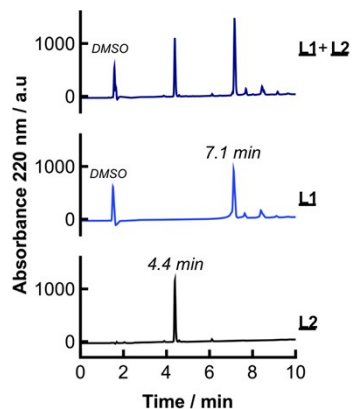

**Figure S5 – Comparison of L1 and L2 hydrophobicity.** Injection of a solution of L1, L2, or a mixture of both, in water/0.1% TFA on a C18 column using a gradient of 5 to 70% ACN/0.1% TFA in 10 minutes. Stock solution of L1 contains 2% DMSO. Note that the small peaks at a retention time greater than 7.1 min are due to exchange of the Cl ligand in the  $\text{Re}(\text{CO})_3$  coordination sphere with TFA and water during the HPLC purification.

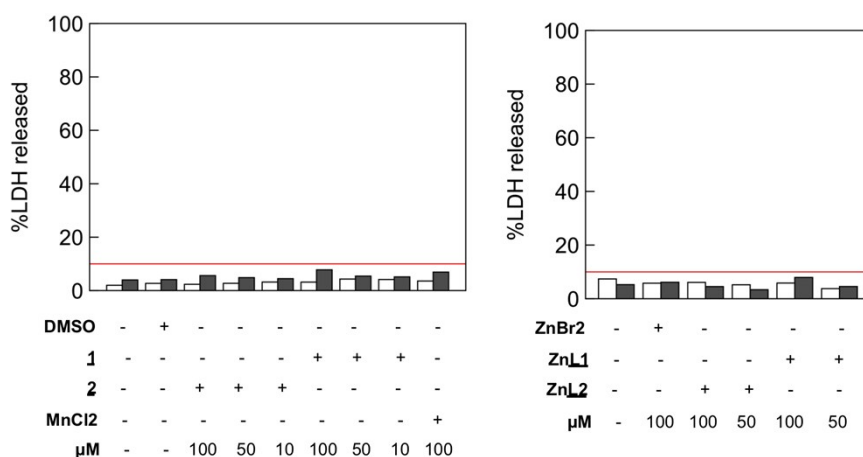

**Figure S6 – %LDH released in activated and non-activated HT29-MD2 cells.** Intestinal epithelial cells HT29-MD2 were incubated for 7 hours under different conditions indicated in the figure. LPS ( $0.1 \mu\text{g}\cdot\text{mL}^{-1}$ ) was added at the end of the first hour. *Left:* Incubation with 1, 2,  $\text{MnCl}_2$ , or DMSO (0.02%) with (gray) or without LPS (white). *Right:* Incubation with  $\text{ZnBr}_2$ , ZnL1, or ZnL2 with (gray) or without LPS (white). Stock solution of L1 contains 2% DMSO. The final concentration of DMSO during the incubation does not exceed 0.02%.

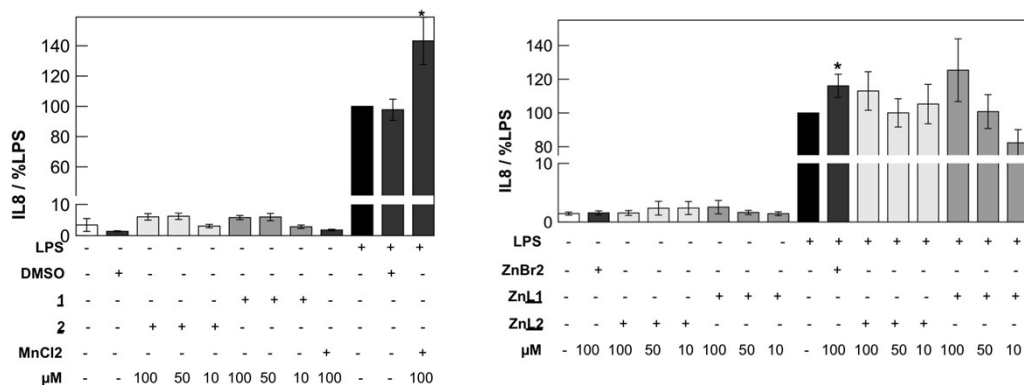

**Figure S7 – IL8 secretion in HT29-MD2 cells.** Intestinal epithelial cells HT29-MD2 were incubated for 7 hours under different conditions indicated in the figure. LPS ( $0.1 \mu\text{g}\cdot\text{mL}^{-1}$ ) was added at the end of the first hour. *Left:* Incubation with 1, 2,  $\text{MnCl}_2$ , or DMSO (0.02%) with or without LPS. Data represent means  $\pm$  SEM for 7-10 independent experiments. *Right:* Incubation with  $\text{ZnBr}_2$ , ZnL1, or ZnL2. Stock solution of L1 contains 2% DMSO. The final concentration of DMSO during the incubation does not exceed 0.02%. Data represent means  $\pm$  SEM for 4-5 independent experiments.

A pro-inflammatory effect of  $\text{MnCl}_2$  and  $\text{ZnBr}_2$  is observed (IL8 secretion higher than for LPS-activated cells).

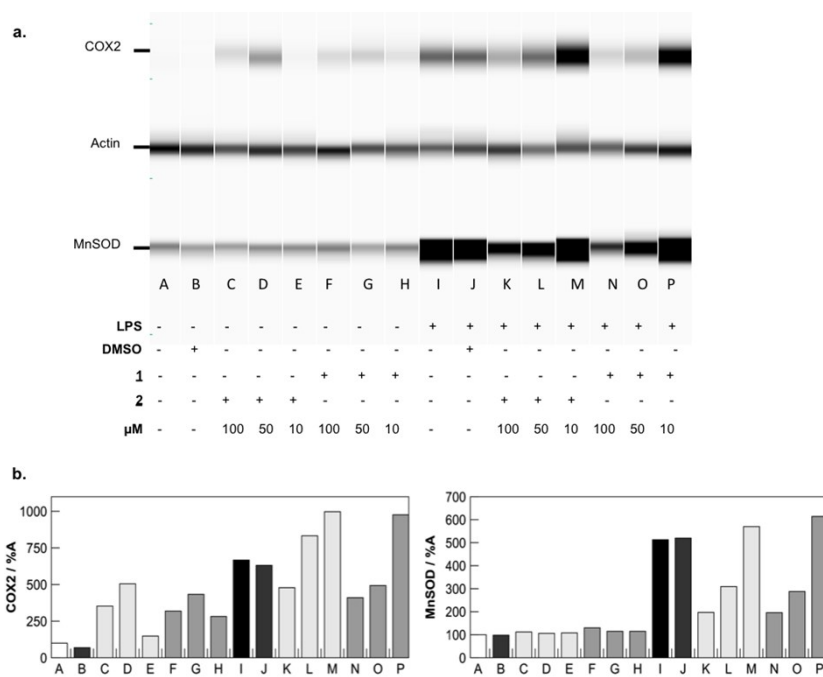

**Figure S8 – COX2, MnSOD and actin expression in HT29-MD2 cells.** Intestinal epithelial cells HT29-MD2 were incubated for 7 hours under different conditions indicated in the figure. LPS ( $0.1 \mu\text{g}\cdot\text{mL}^{-1}$ ) was added at the end of the first hour. **a:** Detection of COX2, actin, and MnSOD by capillary electrophoresis. **b:** Plot of the ratio of the band intensities for COX2/actin, and MnSOD/actin as a percentage of A (non-activated cells). Stock solution of enPI<sub>2</sub>-RePyta contains 2%DMSO. The final concentration of DMSO during the incubation does not exceed 0.02%.

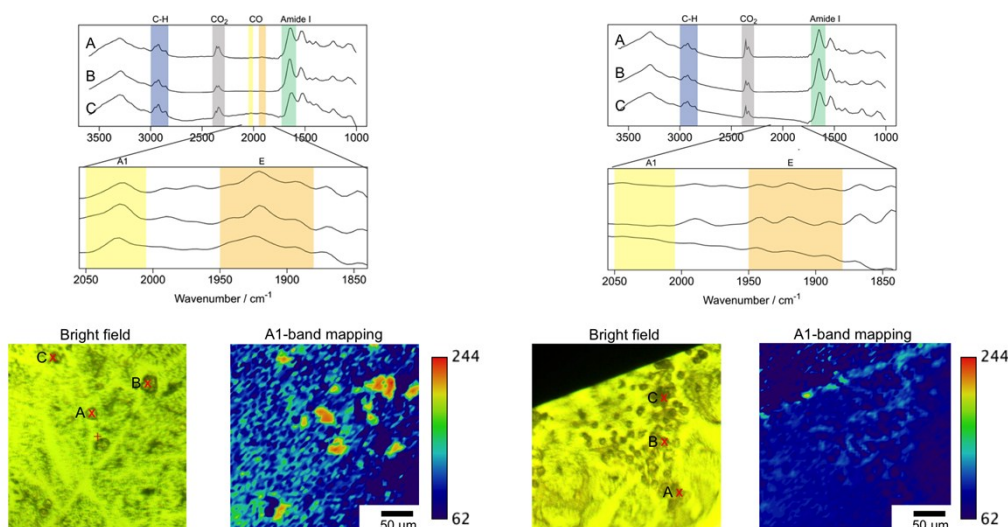

**Figure S9 – Infra-red (IR) detection of **1** in cryofixed and freeze-dried HT29-MD2 cells.** *Left:* Transmission IR spectra of HT29-MD2 cells incubated with **1** ( $100 \mu\text{M}$ , 0.02%DMSO) for 6 hours before cryofixation and freeze-drying. Spectrum at different positions showing A1 and E-bands characteristic of carbonyl group coordinated to Re. Bright-field, and FTIR-SM image based on the integration of A1-band ( $2055\text{-}2005 \text{ cm}^{-1}$ ); 256 scans,  $8 \text{ cm}^{-1}$  spectral width. *Right:* Transmission IR spectra of HT29-MD2 cells cryofixed and freeze-dried. Bright-field and FTIR-SM image based on the integration of A1-band ( $2055\text{-}2005 \text{ cm}^{-1}$ ); 256 scans,  $8 \text{ cm}^{-1}$  spectral width. No signal for the carbonyl group is detected on the IR spectra recorded on cells. Scale bar,  $50 \mu\text{m}$ .

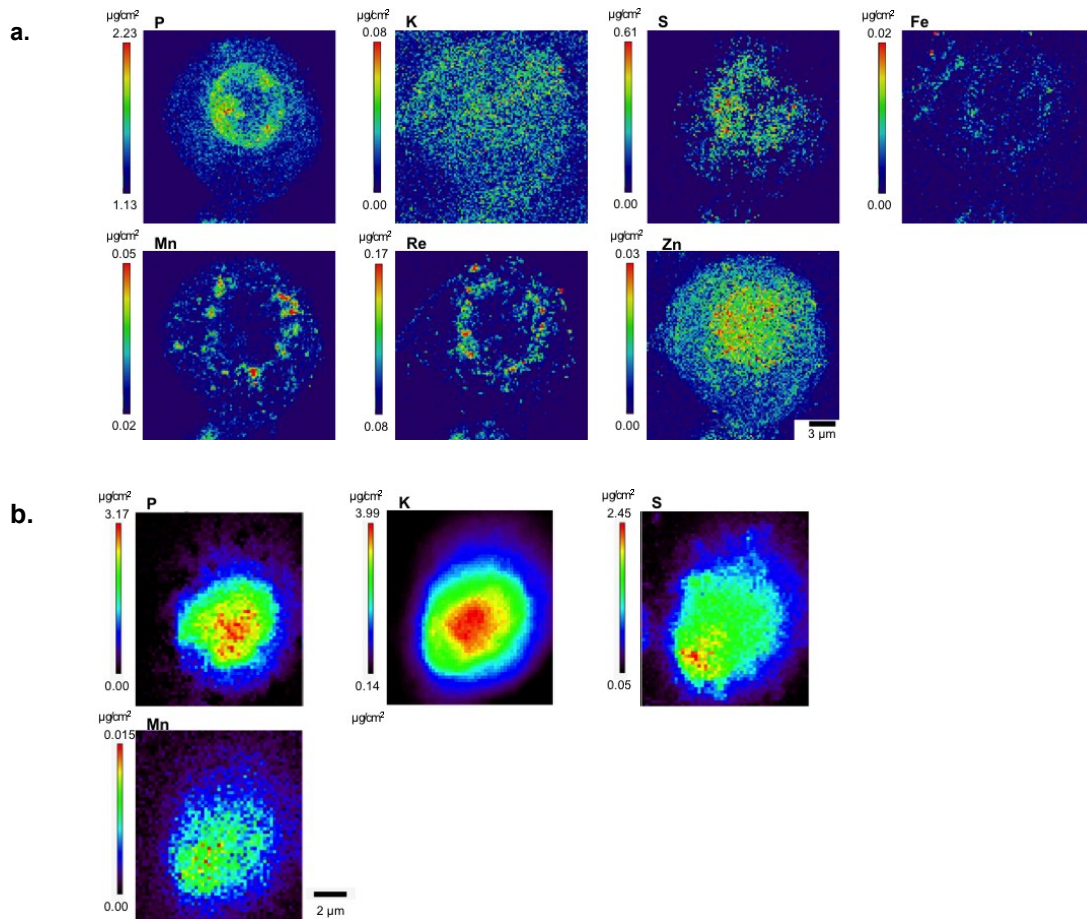

**Figure S10 – Elemental distribution of P, K, S, Fe, Mn, Re, and Zn in a HT29-MD2 cell incubated with 1 (a), and a control cell (b).** The phosphorus (P) and zinc (Zn) maps are used to identify the nucleus area. a: Intestinal epithelial cells HT29-MD2 were incubated for 2 hours with 1 (100  $\mu\text{M}$ , 0.02%DMSO) before washing with 50 mM EDTA, cryofixation and freeze-drying. Images were recorded on the 2-ID-D beamline of APS synchrotron (excitation at 12.0 keV; integration time, 2 s/pixel; pixel size, 200 nm). Scale bar, 3  $\mu\text{m}$ ; b: Control cell. Images were recorded on the 2-ID-D beamline of APS synchrotron (excitation 6.8 keV; integration time, 2 s/pixel; pixel size, 200 nm).

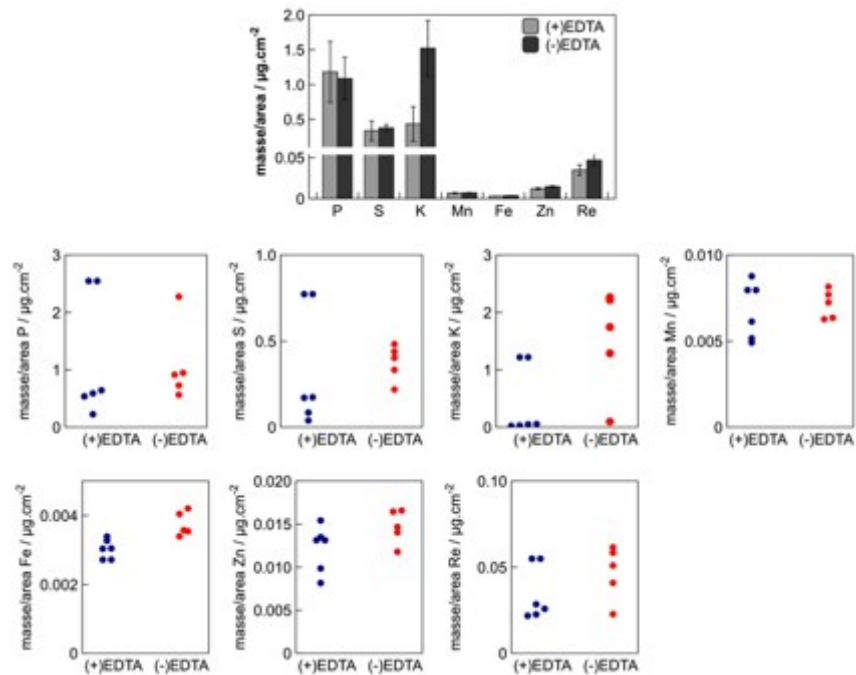

**Figure S11 – Quantification of P, S, K, Mn, Fe, Zn, and Re HT29-MD2 cell incubated with 1, with or without EDTA washing.** Intestinal epithelial cells HT29-MD2 were incubated for 2 hours with 1 (100  $\mu\text{M}$ , 0.02%DMSO) before washing (with or without 50 mM EDTA), cryofixation and freeze-

drying. The concentrations were obtained by calibration using standards for each element, apart Re. For the latter, no standard is available, the concentration may thus vary by  $\pm 50\%$ . *Top*: Data represent the mean concentration ( $\mu\text{g}/\text{cm}^2$ ) of each element  $\pm$  SEM for  $n = 5$  or 6 cells ((-)EDTA and (+)EDTA respectively). *Bottom*: Plot of the element concentration ( $\mu\text{g}/\text{cm}^2$ ) in each cell. Images were recorded on the 2-ID-D beamline of APS synchrotron (excitation at 12.0 keV; integration time, 2 s/pixel; pixel size, 200 nm).

The washing with EDTA does not change the concentration of Mn and Re in cells.

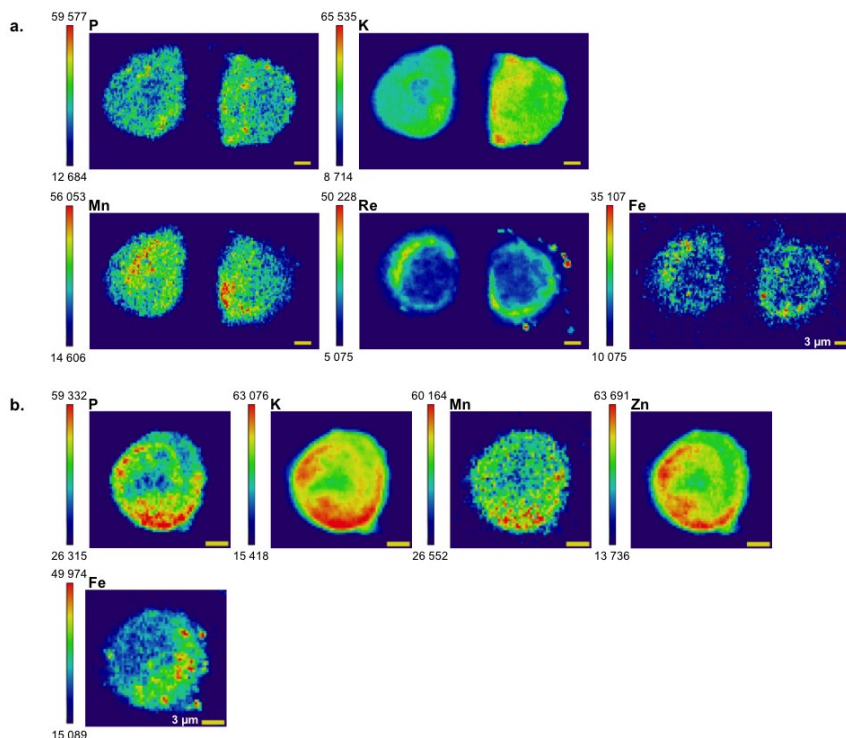

**Figure S12 – Elemental distribution in HT29-MD2 cells incubated with 1 (a), and a control cell (b).** Intestinal epithelial cells HT29-MD2 were incubated for 1 h 30 with 1 (100  $\mu\text{M}$ , 0.02%DMSO) or medium only (control) before the addition of Mitotracker™ deep red (200 nM, 30 min), washing with 50 mM EDTA, cryofixation and freeze-drying. Images were recorded on the Nanoscopium beamline of SOLEIL synchrotron. **a**: excitation at 14.1 keV; integration time, 2.4 s/pixel; pixel size, 300 nm; **b**: excitation at 9.9 keV; integration time, 2.4 s/pixel; pixel size, 300 nm. Scale bar, 3  $\mu\text{m}$ . Intensities were normalized to the maximum intensity value for each element and scaled from 0 to  $2^{16}$  (see below).

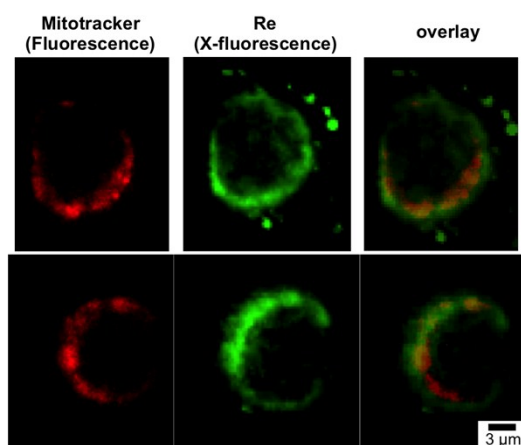

**Figure S13 – Confocal fluorescence images of HT29-MD2 cells incubated with a mitochondrial marker (Mitotracker™, fluorescence) and X-fluorescence maps of 1 (Re, X-fluorescence).** Intestinal epithelial cells HT29-MD2 were incubated for 1 h 30 with 1 (100  $\mu\text{M}$ , 0.02%DMSO) before the addition of Mitotracker™ deep red (200 nM, 30 min), washing with 50 mM EDTA, cryofixation and freeze-drying. Confocal fluorescence images of Mitotracker™ deep red (ex 633 nm, em 645-750 nm) were recorded with open pinhole. X-fluorescence (Re) images were recorded on the Nanoscopium beamline of SOLEIL synchrotron (excitation at 14.1 keV; integration time, 2.4 s/pixel; pixel size, 300 nm). Scale bar, 3  $\mu\text{m}$ .

The overlay shows that part of the Re signal overlap with the Mitotracker™, suggesting that in these areas 1 is localized in the mitochondria. This correlates with EPR titration that shows an accumulation of Mn in these organelles as compared to control cells, but to a lesser extent than Mn1.

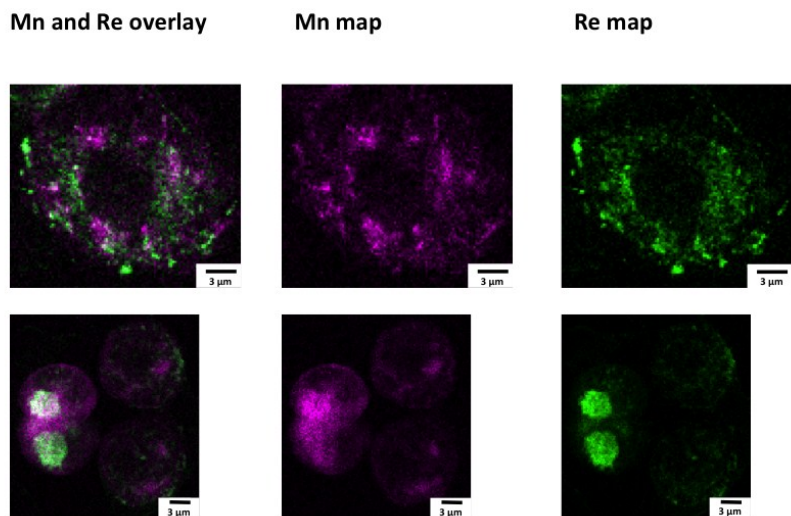

**Figure S14. Elemental distribution of Mn, and Re, and overlay of Mn and Re in a HT29-MD2 cell incubated with 1.** The overlay corresponds to the Mn (magenta) and Re (L-lines) (green) maps. The regions corresponding to an overlap of both elements are displayed in white. Intestinal epithelial cells HT29-MD2 were incubated for 2 hours with 1 (100  $\mu$ M, 0.02%DMSO) before EDTA washing, cryofixation and freeze-drying. Images were recorded on the 2-ID-D beamline of APS synchrotron (excitation at 12.0 keV; integration time, 2 s/pixel; pixel size, 200 nm).

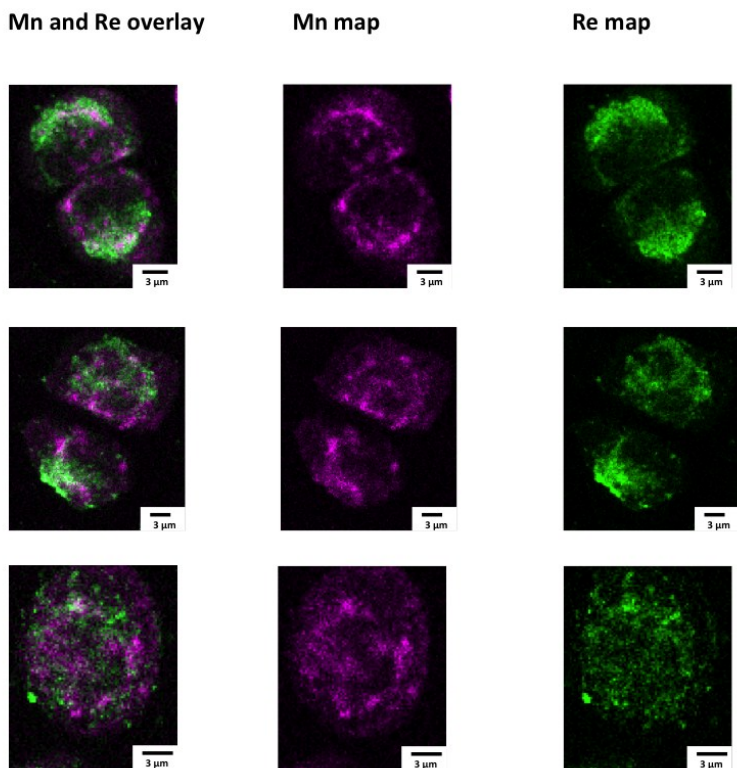

**Figure S15. Elemental distribution of Mn, and Re, and overlay of Mn and Re in a HT29-MD2 cell incubated with 1.** The overlay corresponds to the Mn (magenta) and Re (L-lines) (green) maps. The regions corresponding to an overlap of both elements are displayed in white. Intestinal epithelial cells HT29-MD2 were incubated for 2 hours with 1 (100  $\mu$ M, 0.02%DMSO) before cryofixation and freeze-drying. Note that these cells were not washed with EDTA. Images were recorded on the 2-ID-D beamline of APS synchrotron (excitation at 12.0 keV; integration time, 2 s/pixel; pixel size, 200 nm).



### 3. Determination of the intrinsic activity (Fridovich assay and stopped-flow)

The SOD activity of **1** and **2** was determined by the McCord-Fridovich assay using the xanthine (200  $\mu\text{M}$ )/xanthine oxidase system to produce superoxide, and ferricytochrome c (22  $\mu\text{M}$ ) (see Table 1).<sup>1-3</sup> The SOD activity of **1** was additionally determined by stopped-flow measurements (see Table 2).<sup>4,5</sup>

IC<sub>50</sub> values represent the concentration at which 50% of the superoxide reacts with the compound assayed. The constant  $k_{\text{McCF}}$  is determined using the reported  $k_{\text{McCF}}$  for ferricytochrome c (2.6  $\times 10^5 \text{ M}^{-1}\cdot\text{s}^{-1}$  at pH 7.8).<sup>3, 6</sup> Stock solution of **L1** (10 mM) contains 2%DMSO.

In this assay, superoxide is produced continuously by a xanthine/xanthine oxidase system and reduces ferricytochrome c, which is used as superoxide marker. IC<sub>50</sub> is the concentration for which the kinetics of the reduction of ferricytochrome c is divided by two. This is also the concentration at which 50% of the superoxide produced reacted with the compound assayed. From this value, the constant  $k_{\text{McCF}}$  is determined using the relation:<sup>1-3, 6</sup>

$$\text{IC}_{50} \times k_{\text{McCF}} = [\text{cyt c}] \times k_{\text{cytc}}$$

Table S1 – IC<sub>50</sub> values determined by McCord-Fridovich assay

|                       | IC <sub>50</sub> buffer pH (10 <sup>-7</sup> M) | k <sub>McCF</sub> (M <sup>-1</sup> .s <sup>-1</sup> ) |
|-----------------------|-------------------------------------------------|-------------------------------------------------------|
| <sup>a</sup> <b>2</b> | IC <sub>50</sub> phosphate 7.8 = 8.1 $\pm$ 0.3  | (7.0 $\pm$ 0.3) $\times 10^6$                         |
| <sup>b</sup> <b>1</b> | IC <sub>50</sub> HEPES 7.8 = 8.5 $\pm$ 0.2      | (6.4 $\pm$ 0.2) $\times 10^6$                         |

<sup>a</sup> Data from Cisnetti, Eur. J. Inorg. Chem., 2007, 4472-4480

<sup>b</sup> This work. Data are given as mean  $\pm$  standard deviation for 3 independent experiments.

Table S2 – k<sub>cat</sub> determined by stopped-flow

|          | pH 7.4 (M <sup>-1</sup> .s <sup>-1</sup> ) | pH 7.8 (M <sup>-1</sup> .s <sup>-1</sup> ) |
|----------|--------------------------------------------|--------------------------------------------|
| <b>1</b> | 1.651 $\pm$ 0.010 $\times 10^7$            | (6.457 $\pm$ 0.148) $\times 10^6$          |

A stock solution (1.00  $\times 10^{-4}$  M) of ligand was prepared in each buffer containing 10% of DMSO and 1 eq. of MnCl<sub>2</sub> was added (stock solution) to form the complexes of interest *in situ*. The complex stock was diluted in buffer to give a series of concentrations suitable for the stopped flow experiments.

Kinetic measurements were performed applying a large excess of superoxide over putative SOD mimetic ([O<sub>2</sub><sup>-</sup>] = 100 – 200  $\mu\text{M}$  and [SODm] = 0.25 – 4.5  $\mu\text{M}$ ). The concentrations were corrected for the K<sub>diss</sub> (6.1  $\pm$  0.1)  $10^{-7}$  M of a similar conjugated complex because of the low assaying concentrations.<sup>4,5</sup> All kinetic data were fitted with the program Biokine 32 V4.80. Each k<sub>obs</sub> value represents an average of at least nine measurements. k<sub>cat</sub> was determined from the slope of k<sub>obs</sub> vs. [SODm]. All measurements were performed at 21 °C.

### 4. Synthesis of **L2**

**L2** was synthesized according to a previously reported procedure.<sup>7</sup>

## 5. Synthesis of L1

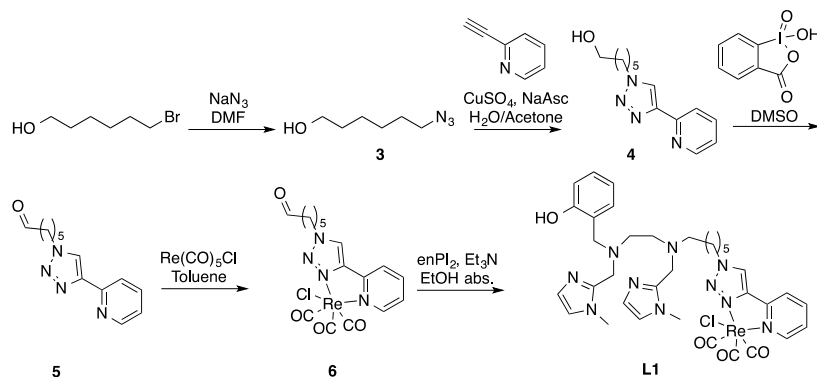

Unless otherwise stated, yields were calculated on the purified product.

### 6-azidohexan-1-ol (3)

To a solution of sodium azide (2.0 g, 30.6 mmol, 4 eq) in DMF was added 6-bromohexan-1-ol (1.0 mL, 7.6 mmol, 1 eq) at room temperature. The reaction was then stirred at 70 °C overnight. Water (20 mL) was added and the aqueous phase was extracted three times with diethyl ether. The organic phase was washed once with brine, dried over anhydrous Na<sub>2</sub>SO<sub>4</sub>, filtered and concentrated which afforded the desired compound as a colorless oil. Yield: quantitative (1.14 g (7.6 mmol))

<sup>1</sup>H NMR (300 MHz, Chloroform-*d*): δ 3.65 (t, *J* = 6.5 Hz, 2H, CH<sub>2</sub>OH), 3.27 (t, *J* = 6.9 Hz, 2H, CH<sub>2</sub>N<sub>3</sub>), 1.60 (m, 4H, CH<sub>2</sub>), 1.40 (m, 4H, CH<sub>2</sub>).

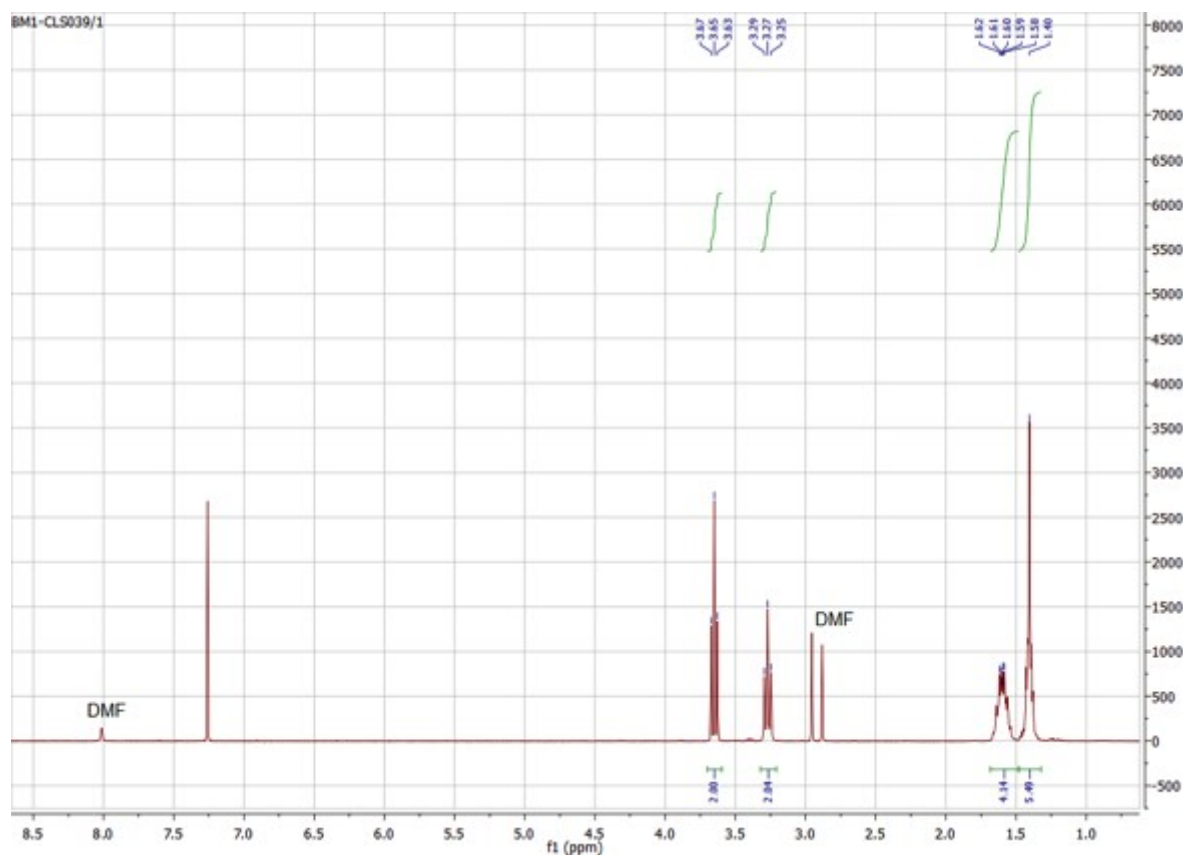

## 2-(1-hexan-6-ol-1,2,3,4-triazol-4-yl)-pyridine (**4**)

To a solution of **3** (0.593 g, 4.15 mmol, 1 eq) in acetone/water (90 mL, 2:1) were added ethynylpyridine (0.42 mL, 4.15 mmol, 1 eq), copper sulfate (0.259 g, 1.04 mmol, 0.25 eq) and sodium ascorbate (0.409 g, 2.07 mmol, 0.5 eq) at room temperature. The reaction was stirred for 2 h at room temperature under nitrogen atmosphere and then aqueous ammonia (28 % v:v) was added (50 mL). The aqueous phase was extracted three times with ethyl acetate (100 mL). The organic phases were combined and dried over anhydrous  $\text{Na}_2\text{SO}_4$ , filtered and concentrated to dryness. The organic fraction was purified by column chromatography ( $\text{SiO}_2$ , AcOEt/MeOH 98:2, 850 mL), affording the product as a white-yellow powder. Yield: 49 % (502 mg (2.02 mmol)).

$^1\text{H}$  NMR (300 MHz, Chloroform-*d*):  $\delta$  8.57 (ddd,  $J = 4.9, 1.8, 1.0$  Hz, 1H,  $\mathbf{H}_{\text{py}}$ ), 8.20 (t,  $J = 1.1$  Hz, 1H,  $\mathbf{H}_{\text{py}}$ ), 8.17 (s, 1H,  $\mathbf{H}_{\text{triazole}}$ ), 7.78 (td,  $J = 7.8, 1.8$  Hz, 1H,  $\mathbf{H}_{\text{py}}$ ), 7.23 (ddd,  $J = 7.8, 4.9, 1.8$  Hz, 1H,  $\mathbf{H}_{\text{py}}$ ), 4.43 (t,  $J = 7.1$  Hz, 2H,  $\text{CH}_2\text{-triazol}$ ), 3.62 (t,  $J = 6.3$  Hz, 2H,  $\text{CH}_2\text{OH}$ ), 1.97 (m, 2H,  $\text{CH}_2$ ), 1.62 – 1.50 (m, 2H,  $\text{CH}_2$ ), 1.49 – 1.30 (m, 4H,  $\text{CH}_2$ ).

$^{13}\text{C}$  NMR (75 MHz, Chloroform-*d*):  $\delta$  149.3 ( $\text{CH}_{\text{Ar}}$ ), 136.9 ( $\text{CH}_{\text{Ar}}$ ), 130 ( $\text{C}_{\text{qAr}}$ ), 122.7 ( $\text{CH}_{\text{Ar}}$ ), 121.7 ( $\text{CH}_{\text{Ar}}$ ), 120.1 ( $\text{CH}_{\text{Ar}}$ ), 62.3, 50.1, 32.3, 30.1, 26.0, 25.0 ( $\text{CH}_2$ ).

HRMS+ (ESI): calcd for  $\text{C}_{13}\text{H}_{18}\text{N}_4\text{O}$  :  $m/z$  269.1376. Found:  $m/z$  269.1373.

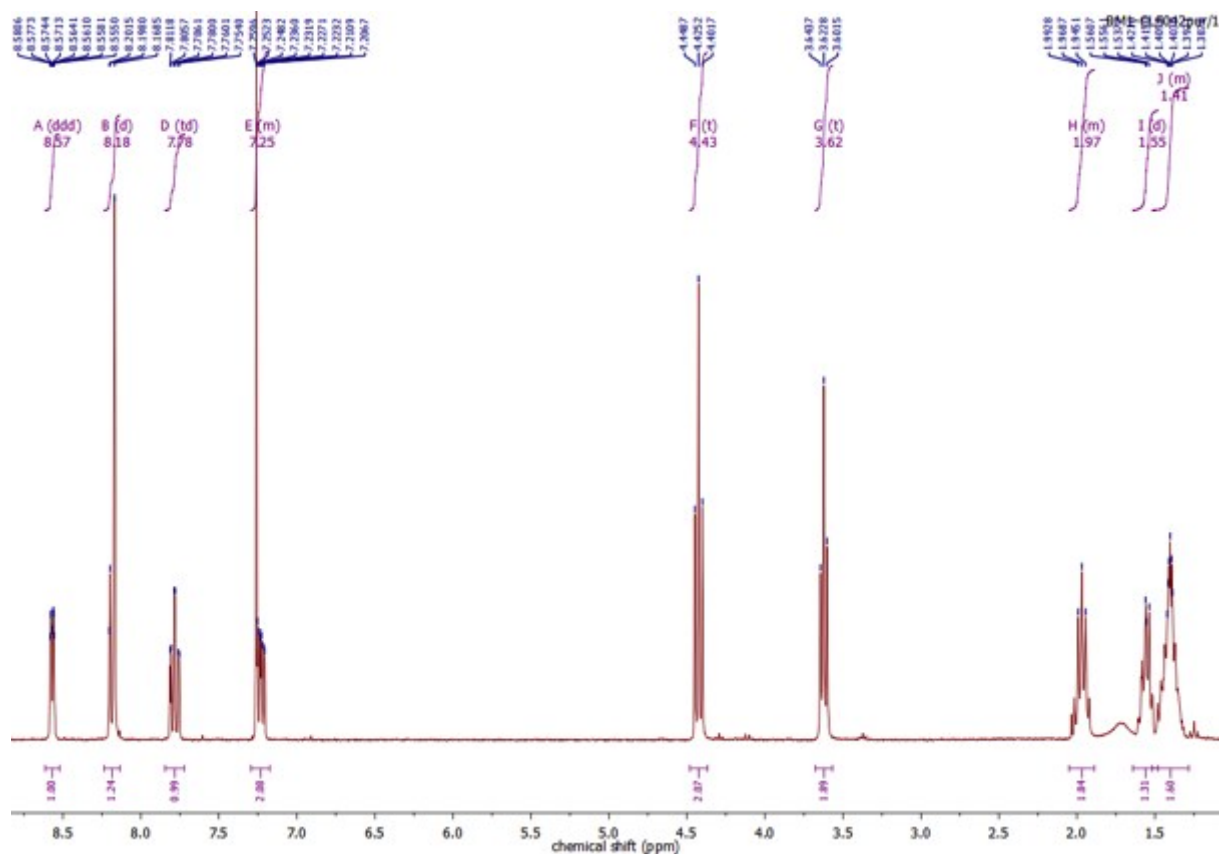

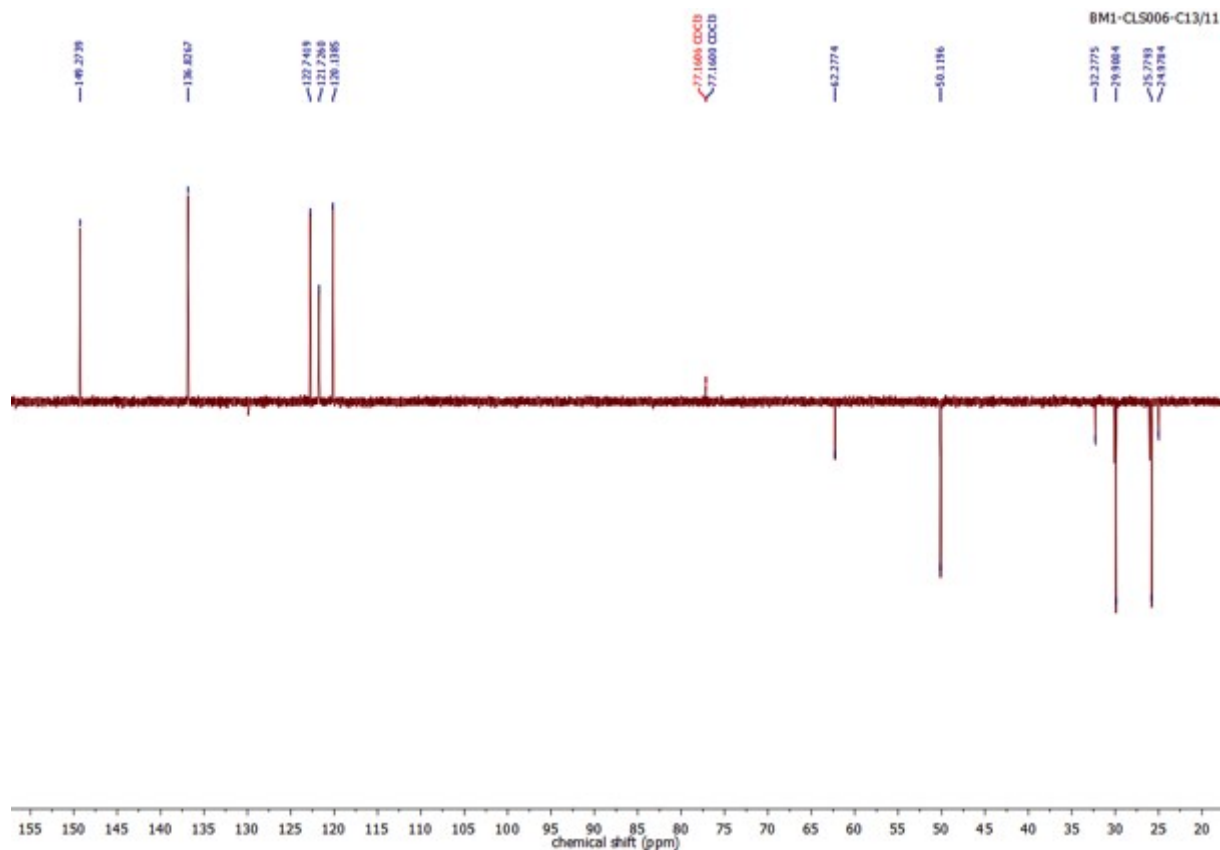

### J-mod $^{13}\text{C}$ -spectrum

#### 2-(1-hexanal-1,2,3,4-triazol-4-yl)-pyridine (**5**)

To a solution of **4** (253 mg, 1.02 mmol, 1 eq) in DMSO (6 mL) was added 2-iodoxybenzoic acid (0.343 g, 1.23 mmol, 1.2 eq). The reaction was stirred under nitrogen atmosphere overnight at room temperature. Water (50 mL) was added and the resulting solution was filtered over a sintered filter and thoroughly washed with ethyl acetate. The organic phase was extracted three times with ethyl acetate, washed with aq.  $\text{NaHCO}_3$  and brine, dried over anhydrous  $\text{Na}_2\text{SO}_4$ , filtered and concentrated. The desired product appeared as a yellow solid and was used without further purification. Yield: 86 % (213 mg (0.87 mmol)).

$^1\text{H}$  NMR (300 MHz, Chloroform-*d*):  $\delta$  9.76 (t,  $J = 1.5$  Hz, 1H, CHO), 8.58 (ddd,  $J = 4.9, 1.8, 1.1$  Hz, 1H,  $\text{CH}_{\text{pyr}}$ ), 8.18 (dt,  $J = 8.0, 1.1$  Hz, 1H,  $\text{CH}_{\text{pyr}}$ ), 8.12 (s, 1H,  $\text{CH}_{\text{triazole}}$ ), 7.78 (ddd,  $J = 8.0, 7.6, 1.8$  Hz, 1H,  $\text{CH}_{\text{pyr}}$ ), 7.23 (ddd,  $J = 7.6, 4.9, 1.1$  Hz, 1H,  $\text{CH}_{\text{pyr}}$ ), 4.43 (t,  $J = 7.0$  Hz, 2H,  $\text{CH}_2$ -triazole), 2.45 (td,  $J = 7.2, 1.5$  Hz, 2H,  $\text{CH}_2\text{CHO}$ ), 1.99 (dt,  $J = 14.8, 7.0$  Hz, 2H,  $\text{CH}_2$ ), 1.68 (dt,  $J = 15.1, 7.2$  Hz, 2H,  $\text{CH}_2$ ), 1.46 – 1.32 (m, 2H,  $\text{CH}_2$ ).

$^{13}\text{C}$  NMR (75 MHz, Chloroform-*d*):  $\delta$  201.8 (CHO), [149.2, 136.8, 122.7, 121.7, 120.1] ( $\text{C}_{\text{ar}}$ ), [50.0, 43.4, 30.0, 25.9, 21.2, 21.2] ( $\text{CH}_2$ ).

HRMS<sup>+</sup> (ESI): calcd for  $\text{C}_{13}\text{H}_{16}\text{N}_4\text{O}$ :  $m/z$  267.1220. Found:  $m/z$  267.1216.

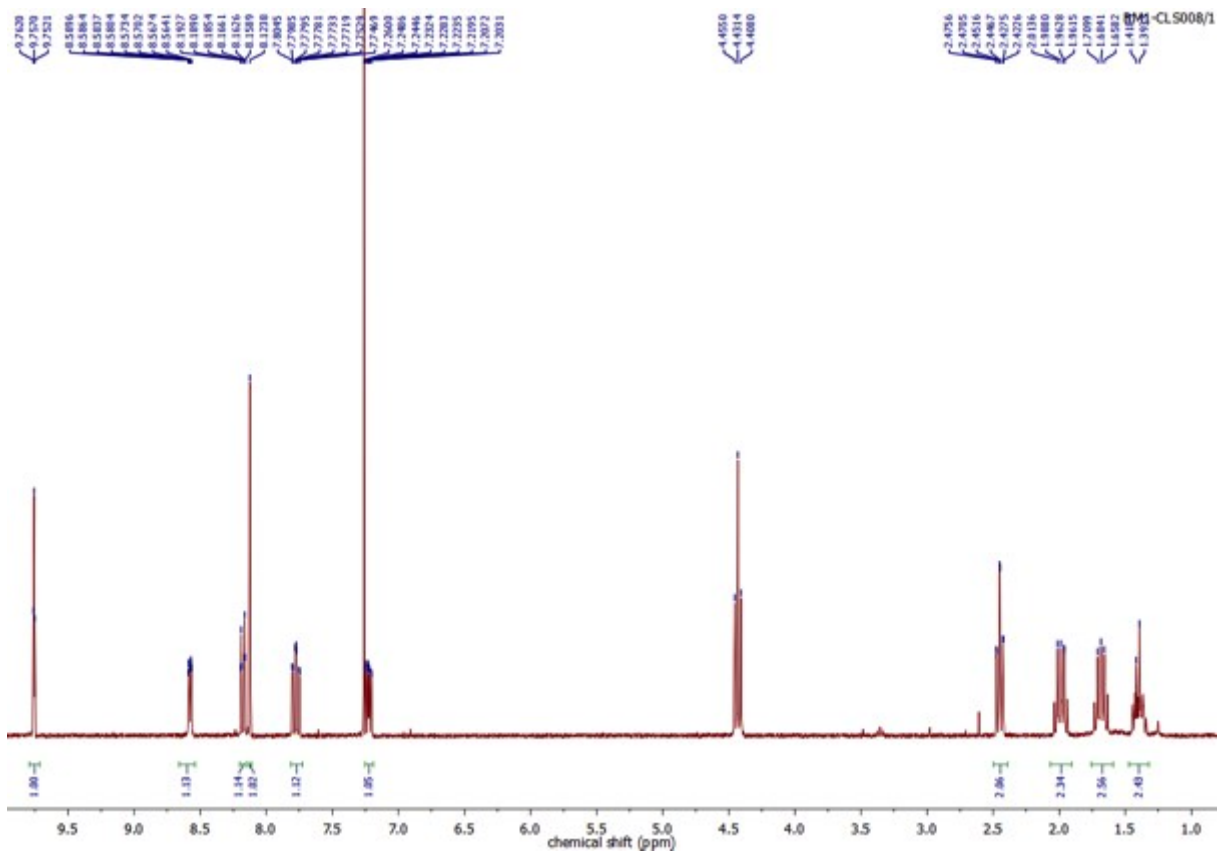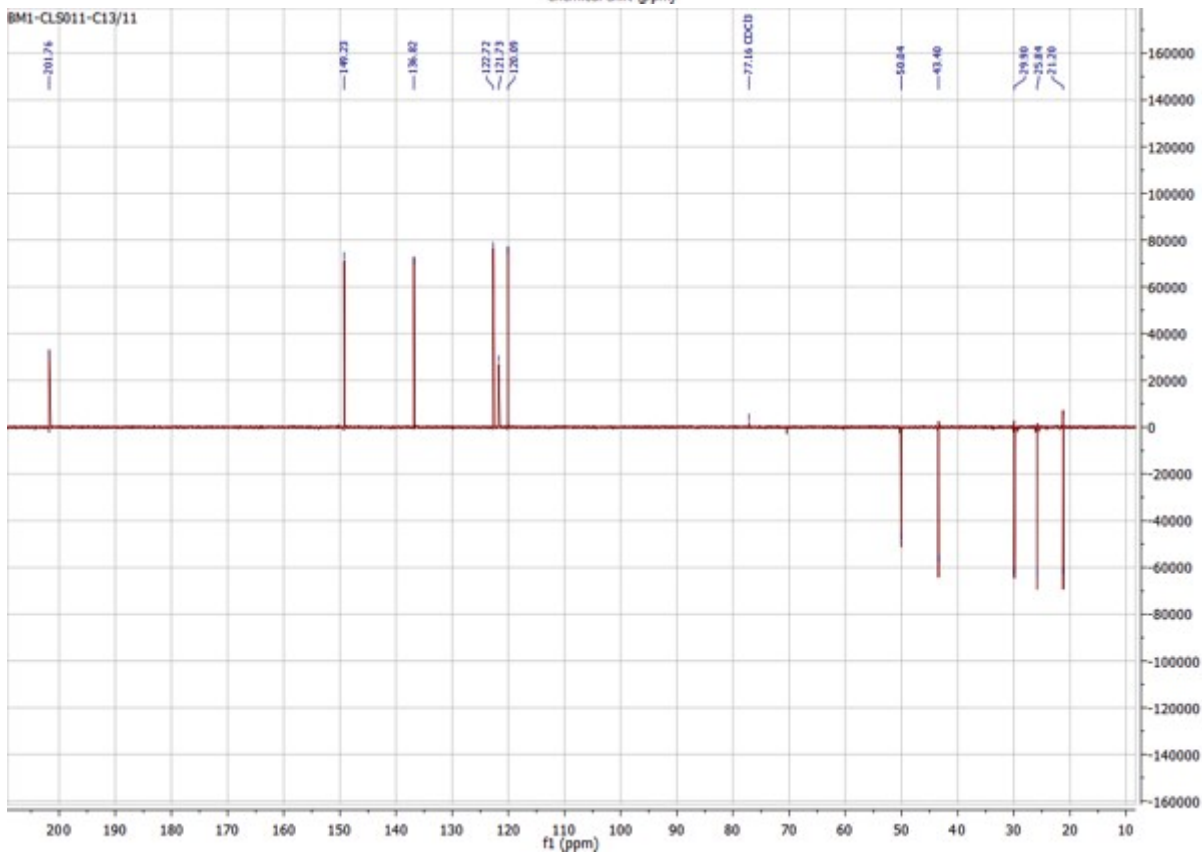

J-mod <sup>13</sup>C-spectrum

### fac-[Re(CO)<sub>3</sub>Cl(2-(1-hexanal-1,2,3, triazol-4-yl)-pyridine)] (**6**)

To a solution of **5** (0.210 g, 0.86 mmol, 1 eq) in toluene (10.5 mL) was added rhenium-pentacarbonyl chloride (0.311 g, 0.86 mmol, 1 eq) at room temperature. The reaction was refluxed at 110°C for 3 h. After cooling, the solvent was evaporated. The brown solide was purified by column chromatography (SiO<sub>2</sub>, EtOAc/MeOH 95/5, 750 mL), affording the pure product as a yellow oil.

Mass: 364 mg

Yield: 77 %

<sup>1</sup>H NMR (300 MHz, Chloroform-*d*): δ 9.79 (t, *J* = 1.2 Hz, 1H, CHO), 9.03 (d, *J* = 5.6 Hz, 1H, H<sub>pyr</sub>), 8.29 (s, 1H, H<sub>triazole</sub>), 7.98 (td, *J* = 7.9, 1.5 Hz, 1H, H<sub>pyr</sub>), 7.81 (d, *J* = 7.9 Hz, 1H, H<sub>pyr</sub>), 7.51 – 7.35 (m, 1H, H<sub>pyr</sub>), 4.69 – 4.27 (m, 2H, CH<sub>2</sub>-triazole), 2.62 – 2.40 (m, 2H, CH<sub>2</sub>CHO), 2.04 (t, *J* = 7.4 Hz, 2H, CH<sub>2</sub>), 1.82 – 1.59 (m, 2H, CH<sub>2</sub>), 1.59 – 1.31 (m, 5H, CH<sub>2</sub>), 1.26 (s, 1H).

HRMS+ (ESI): calcd for C<sub>17</sub>H<sub>21</sub>N<sub>4</sub>O<sub>4</sub>ClRe: *m/z* 573.0295. Found: *m/z* 573.0310.

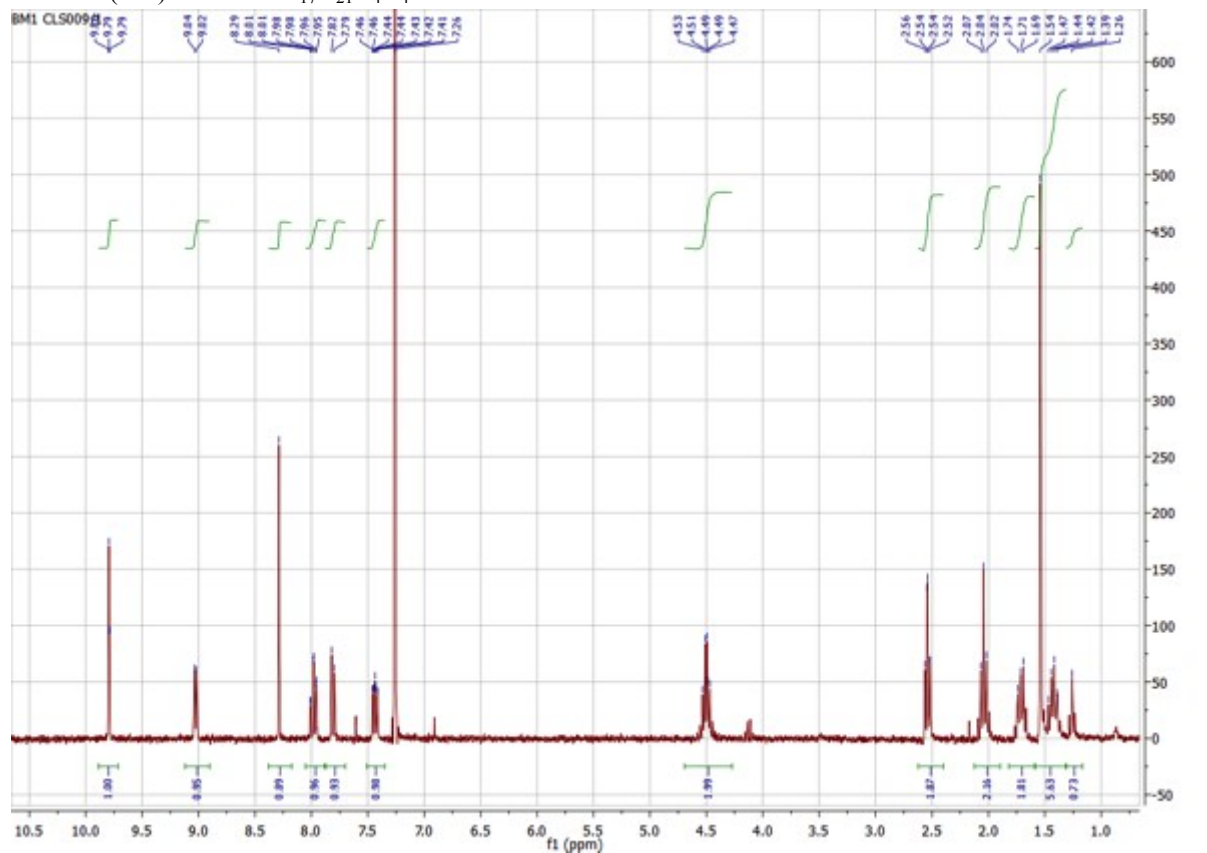

### **L1**

To a solution of **L2** (298 mg, 0.51 mmol, 1 eq) in absolute ethanol (26 mL) was added triethylamine (70 μL, 0.51 mmol, 1 eq) and **6** (282 mg, 0.51 mmol, 1 eq). The reaction was stirred under nitrogen atmosphere overnight. To this solution sodium cyanoborohydride (77.3 mg, 1.23 mmol, 2.4 eq) and TFA (0.08 mL, 1.03 mmol, 2 eq) were added, the reaction was stirred overnight. The pH was set to 8 ± 0.4 with a saturated solution of sodium hydrogenocarbonate, and ethanol was evaporated under reduced pressure. Then dichloromethane and water (4:1, 30 mL) were added and the pH was set to 9.6 ± 0.2. The aqueous phase was extracted three times with dichloromethane and the combined organic fractions were dried upon anhydrous Na<sub>2</sub>SO<sub>4</sub>, filtered and concentrated. The resulting yellow oil was purified by preparative HPLC (acetonitrile/water + TFA 0.1 %, gradient from 10 to 100 in 30 minutes, *t<sub>R</sub>* = 5.9 min). Yield: 26 % (120 mg).

<sup>1</sup>H NMR (300 MHz, Methanol-*d*<sub>4</sub>): δ 9.05 (d, *J* = 5.5 Hz, 1H, H<sub>pyr</sub>), 8.96 (s, 1H, H<sub>pyr</sub>), 8.31 – 8.11 (m, 2H, H<sub>ar</sub>), 7.61 (t, *J* = 6.0 Hz, 1H, H<sub>Ar</sub>), 7.51 – 7.30 (m, 3H, H<sub>Ar</sub>), 7.19 – 7.05 (m, 2H, H<sub>phenol</sub>), 6.88 – 6.71 (m, 2H, H<sub>phenol</sub>), 4.63 (m, 2H, ethane bridge), 4.12 (s, 2H, N-CH<sub>2</sub>-Im), 4.08 (s, 2H, N-CH<sub>2</sub>-Im), 3.83 (s, 3H, CH<sub>3</sub>-Im), 3.76 (s, 3H, CH<sub>3</sub>-Im), 3.74 (m, 4H, CH<sub>2</sub>), 2.94 (m, 4H, CH<sub>2</sub>), 2.69 – 2.58 (m, 2H, CH<sub>2</sub>-Phenol), 2.01 (m, 2H, ethane bridge), 1.48 (m, 2H, CH<sub>2</sub>), 1.31 (m, 4H, CH<sub>2</sub>).

$^{13}\text{C}$  NMR (75 MHz, Methanol- $d_4$ ):  $\delta$  [157.0, 154.8, 151.0, 150.6, 146.0, 142.0, 132.6, 130.7, 127.3, 126.1, 125.4, 125.1, 123.5, 121.3, 120.8, 119.8, 116.4] ( $\text{CH}_{\text{Ar}}$ ), [55.7, 55.5, 53.0, 52.9, 52.6, 34.8, 30.7, 30.6, 27.2, 26.7, 26.4, 24.2] ( $\text{CH}_2$ ).  
 HRMS+ (ESI): calcd for  $\text{C}_{35}\text{H}_{42}\text{N}_{10}\text{O}_4\text{Re}^+$ :  $m/z$  853.2944. Found:  $m/z$  853.2943.

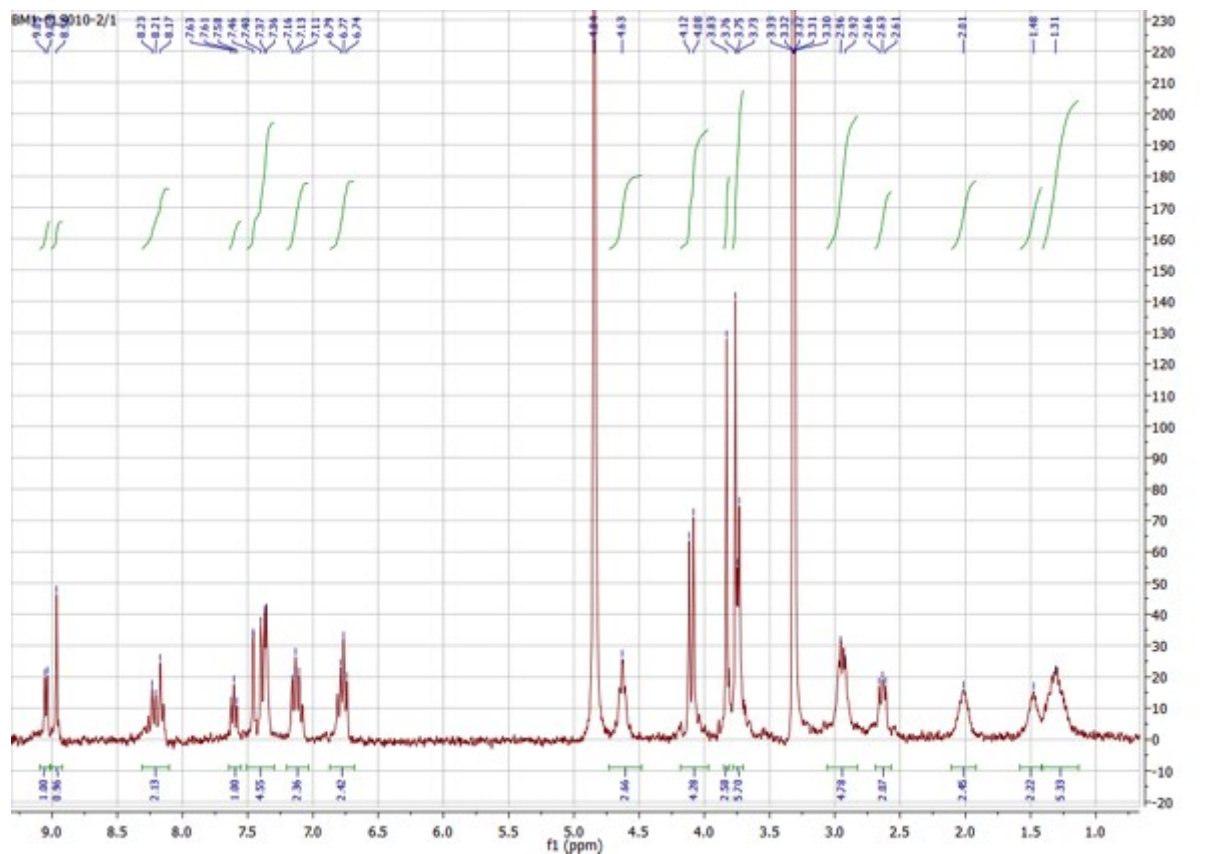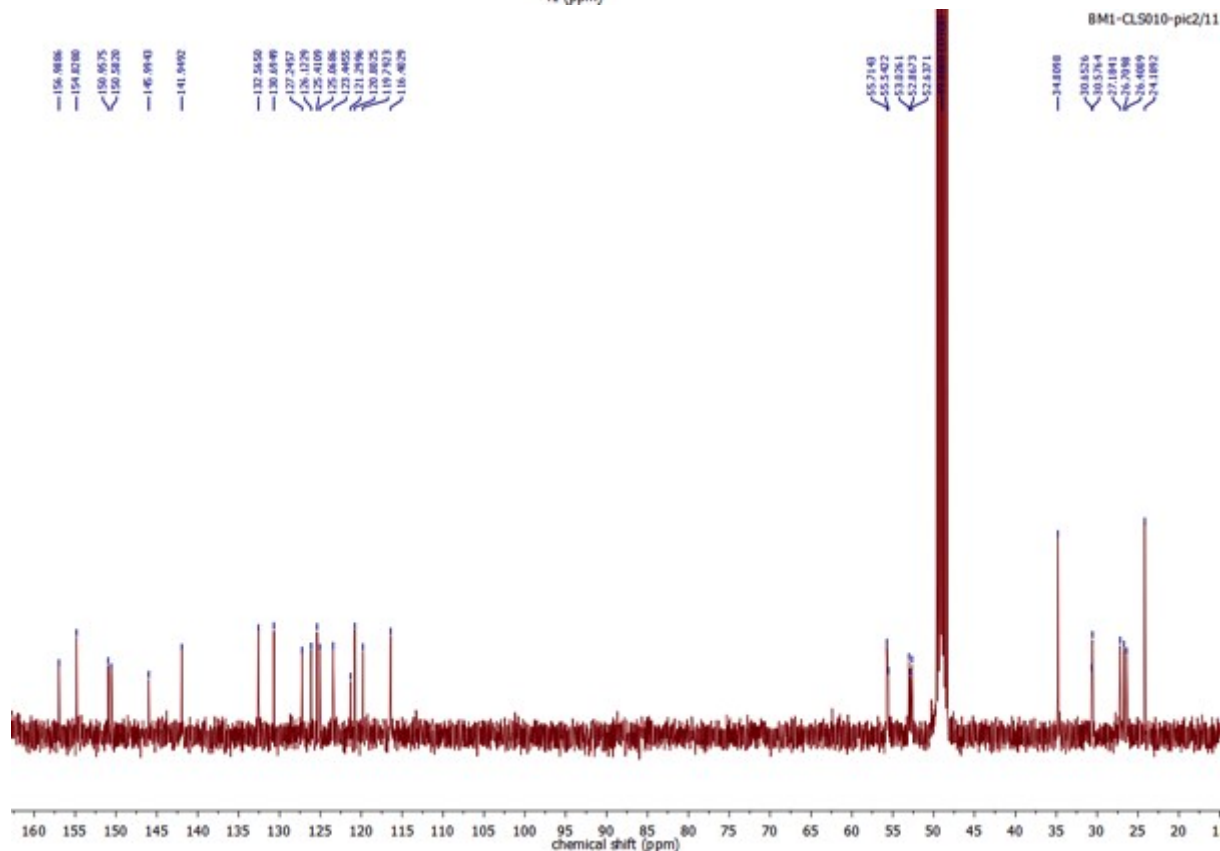

$^{13}\text{C}$ -spectrum

## 6. Preparation of the complexes and UV-visible titration

The ligand (**L1**, or **L2**<sup>7</sup>) was purified by HPLC and lyophilized. **L2** was redissolved in milliQ water (80 mg.mL<sup>-1</sup>). **L1** was redissolved in milliQ water containing 2% DMSO (14mg.mL<sup>-1</sup>). An aliquot of the resulting solution was diluted in HEPES buffer (0.1 M, pH 7.5) and its concentration was determined by UV-visible titration by successive addition of MnCl<sub>2</sub> (10 mM), by following the absorbance at 280 nm. The titration was performed twice.

The stock solutions of ligand were then filtered on 0.2 μm sterile filter and diluted to a concentration of 10 mM. Aliquots were prepared and frozen (-20 °C) until used. Stock solution of **L1** contains at most 2%DMSO.

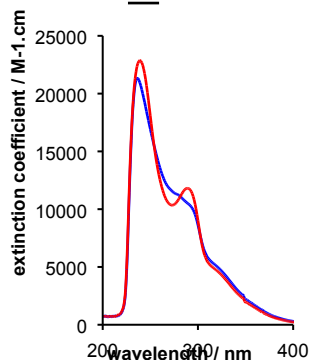

Absorption spectra of **L1** (blue) and **1** (red)

Stock solutions of Mn<sup>2+</sup> (Zn<sup>2+</sup>)-complexes at 5 mM were prepared before each experiment by addition of 1.1 eq. of anh. MnCl<sub>2</sub> (anh. ZnBr<sub>2</sub>) in HEPES buffer (100 mM, pH 7.4) to a solution of ligand, and then diluted in culture medium at the desired incubation concentration. Note that anhydrous salt were used for a better precision when weighting them.

## 7. Characterization of **1**

### Emission spectra

**L1** and **1** were diluted into HEPES buffer (0.1 M, pH 7.5) to a concentration of 100 μM (containing 0.02%DMSO for **1**). Excitation wavelength, 330 nm. Emission of the buffer was subtracted.

### IR spectra

A drop of a stock solution of **L1** (10 mM, 2%DMSO) in HEPES buffer (0.1 M, pH 7.5) was deposited on a CaF<sub>2</sub> membrane and air-dried before measuring the transmission IR spectra.

### Electrochemistry

**1** was diluted into HEPES buffer (0.1 M, pH 7.5) at a concentration of 100 μM (0.02%DMSO). Cyclic voltammograms were measured at different scan rates (50 to 500 mV/s). Working electrode, glassy carbon disk (3 mm); reference electrode, SCE; counter electrode, Pt wire. The capacitive current was subtracted for each voltammogram.

### HRMS

HRMS<sup>+</sup> (ESI): calcd for C<sub>35</sub>H<sub>41</sub>N<sub>10</sub>O<sub>4</sub>ReMnCl<sup>+</sup>: *m/z* 942.1939. Found: *m/z* 942.1930.

### Determination of the association constants

Association constants were measured by using UV-vis spectrometry. Titration experiments were performed in HEPES (50 mM, pH 7.5) at 25°C. Anhydrous MnCl<sub>2</sub> dissolved in milliQ H<sub>2</sub>O was added to a solution of the ligand at ca 10 μM in 1.5 mL quartz cuvettes.

For **1**, the absorbance at 330 nm was subtracted from the absorbance at 288 nm (characteristic of the Mn complex formation).

For **2**, the absorbance at 320 nm was subtracted from the absorbance at 288 nm.

Experiments were performed at least in duplicate.

During the titration, one equilibrium is considered:



|                          |   |                                            |   |                    |
|--------------------------|---|--------------------------------------------|---|--------------------|
| L                        | + | MnCl <sub>2</sub>                          | = | complex            |
| C <sub>0</sub>           |   | n <sub>equiv.</sub> * C <sub>0</sub>       |   | 0                  |
| C <sub>0</sub> * (1 - X) |   | (n <sub>equiv.</sub> - X) * C <sub>0</sub> |   | X * C <sub>0</sub> |

So the association constant can be written:

$$K_{ass} = \frac{X * C_0}{(n_{equiv.} - X) * C_0 * C_0 * (1 - X)}$$

$$K_{ass} = \frac{X}{(n_{equiv.} - X) * C_0 * (1 - X)}$$

Which gives the second-degree equation to solve:  $aX^2 + bX + c = 0$

$$X^2 - X * \left(1 + n_{equiv.} + \frac{1}{K_{ass} * C_0}\right) + n_{equiv.} = 0$$

$$\Delta = \left(1 + n_{equiv.} + \frac{1}{K_{ass} * C_0}\right)^2 - 4 * n_{equiv.}$$

$$X = \frac{1 + n_{equiv.} + \frac{1}{K_{ass} * C_0} - \sqrt{\left(1 + n_{equiv.} + \frac{1}{K_{ass} * C_0}\right)^2 - 4 * n_{equiv.}}}{2}$$

Considering the UV experiment,

$$A_{288} = \varepsilon_L * l * C_L + \varepsilon_{complex} * l * C_{complex}$$

$A_0 = \varepsilon_L * l * C_0$  : initial absorbance of the free ligand solution (no metal added).

$A_{final} = \varepsilon_{complex} * l * C_0$ : final absorbance when all the ligands are bound to manganese.

$$A_{288} = \frac{A_0}{C_0} * C_L + \frac{A_{final}}{C_0} * C_{complex}$$

$$A_{288} = \frac{A_0}{C_0} * (1 - X)C_0 + \frac{A_{final}}{C_0} * XC_0$$

$$A_{288} = A_0 * (1 - X) + A_{final} * X$$

$$\frac{A_{288} - A_0}{A_0} = \frac{A_{final} - A_0}{A_0} * X$$

$$\frac{A_{288} - A_0}{A_0} = \frac{1 + n_{equiv.} + \frac{1}{K_{ass} * C_0} - \sqrt{\left(1 + n_{equiv.} + \frac{1}{K_{ass} * C_0}\right)^2 - 4 * n_{equiv.}}}{2}$$

In the latter equation, X was replaced by

$$\frac{A_{288} - A_0}{A_0} = \frac{A_{final} - A_0}{A_0}$$

To fit the curve,  $\frac{A_{288} - A_0}{A_0}$  was plotted versus  $n_{equiv.}$ .  $\frac{A_{final} - A_0}{A_0}$  was a variable parameter, as well as  $K_{ass}$ .

$K_{ass}$  of  $1.88 \pm 0.84 \cdot 10^7$  and  $1.75 \pm 0.74 \cdot 10^6$  were found for **1** and **2** respectively. These values lead to  $K_{d1} = 9.00 \pm 4.00 \cdot 10^{-8}$  and  $K_{d2} = 7.00 \pm 3.00 \cdot 10^{-7}$ .

## 8. Experiments on HT29-MD2 cells

### Cell culture

HT29-MD2 intestinal epithelial cells were used for all experiments. HT29 human colon adenocarcinoma were obtained from the European Collection of Authenticated Cell Cultures (ECACC, Wiltshire, UK) and stably transfected to over-express MD2 as previously described.<sup>8,9</sup> Cells were cultured in DMEM supplemented with 10% of heat-inactivated FBS, and 0.1% of blasticidin ( $10 \mu\text{g mL}^{-1}$ ) at 37 °C in a 5% CO<sub>2</sub>/air atmosphere.

## Cytotoxicity assay

Cytotoxicity of the tested compounds and controls, with and without LPS, was assessed using lactate dehydrogenase (LDH) release assay, by following the release of the cytosolic lactate dehydrogenase (LDH) into the supernatant, indicating membrane damages. Cytotoxicity was considered when LDH release was more than 10%.

- Concentration of LDH in supernatant: 800  $\mu$ L of a pyruvate/NADH solution (see below) was added into a 1 mL plastic cuvette, as well as 200  $\mu$ L of supernatant, and the decrease in absorbance at 340 nm was immediately monitored for 1 minute. The slope is proportional to LDH concentration in supernatant.

- Concentration of LDH in cell lysate: 800  $\mu$ L of a pyruvate/NADH solution (see below) was added into a 1 mL plastic cuvette, as well as 190  $\mu$ L of 0.1 M PBS and 10  $\mu$ L of cell lysate, and the decrease in absorbance at 340 nm was immediately measured for 1 minute. The slope is proportional to LDH concentration in cell lysate.

- The percentage of LDH released in the supernatant was calculated as follows:

$$\%LDH_{\text{released}} = (\text{Slope}_{\text{supernatant}} \times 200 \times 5) / (\text{Slope}_{\text{supernatant}} \times 200 \times 5 + \text{Slope}_{\text{lysate}} \times 10 \times 100) \times 100$$

- Solution of pyruvate/NADH: 4.1 mg of pyruvic acid (0.62 mM), and 7.7 mg of NADH (0.18 mM) in 60 mL of 0.1 M PBS (pH 7.4).

## Distribution, and quantification experiments

### *Quantification of Mn-complexes by EPR in cell lysates*

EPR spectra were recorded on a Bruker Elexsys 500 spectrometer (Bruker, Wissembourg, France) operating at X-band (9.82 GHz), and a SHQ high-sensitivity cavity, in a glass capillary tube: microwave power, 32 mW; modulation frequency, 100 kHz; modulation amplitude, 18 G; receiver gain, 60 dB; time constant, 40.96 ms; conversion time, 40.96 ms; datapoints, 1024; field center, 3500 G; sweep width, 1000 G; sweep time, 41.94 s; nine scans; room temperature (21 °C). Data acquisition and processing were performed using Bruker Xepr software.

Cells were cultured in a 75 cm<sup>2</sup> flask to reach 90% confluency. They were incubated with medium only, or tested compounds at the desired concentration for 6 hours, at 37 °C. After a washing with 0.9% NaCl, a chaotropic shock was performed by washing the cells once with 1 M NaCl to remove charged species potentially externally associated to the cells. Cells were washed twice with 0.9% NaCl. They were harvested by scraping and centrifuged at 4°C for 10 min at 900 rpm. The supernatant was removed, 100  $\mu$ L of MilliQ water was added and two freezing/thawing cycles in liquid nitrogen were performed. The protein content was determined for each sample. Cell lysates were acidified with HClO<sub>4</sub> (10% v/v final concentration), which freed manganese(II) ion from coordination.<sup>10</sup> A calibration curve was established using MnCl<sub>2</sub> in water acidified with 10% v/v HClO<sub>4</sub>, and quantification of the manganese-content was performed using the two first lines in the six-line Mn<sup>2+</sup> X-band EPR spectrum and reported per milligram of proteins.

### Calibration with MnCl<sub>2</sub> in 10%v/v HClO<sub>4</sub>:

EPR spectra of MnCl<sub>2</sub> at different concentration:

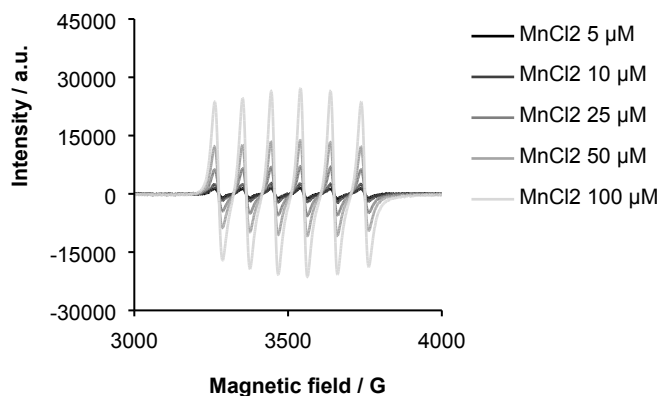

Plot of the two first lines height as a function of MnCl<sub>2</sub> concentration, and linear fit:

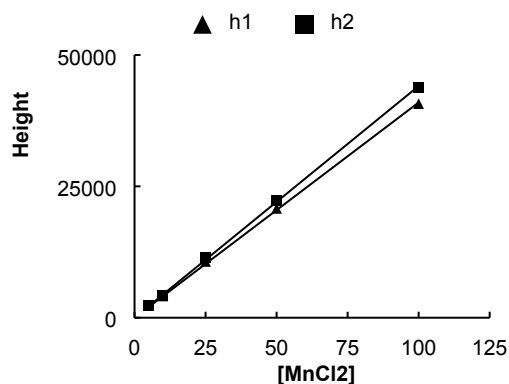

Determination of Mn total amount in samples after acidification with HClO<sub>4</sub>:

EPR spectra of acidified cell lysate of cells incubated with 1, 2 or control cells (T):

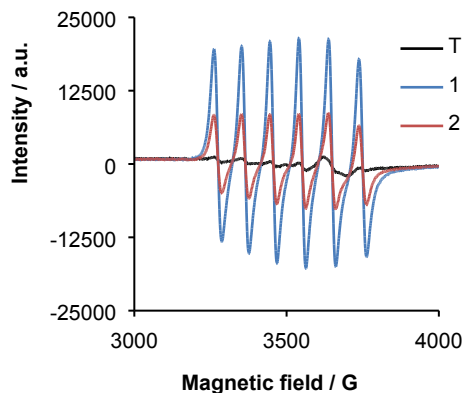

Quantification data obtained for  $n = 4$  experiments are listed in the table below. The heights of the two first lines were measured for each sample and are referred to as h1 and h2, respectively. The linear fit of the calibration curves determined with MnCl<sub>2</sub> to correlate the signal height to the Mn concentration is then used to determine the concentration of Mn in each sample. Two values are obtained, C(h1) determined from h1, and C(h2) determined from h2, and are given in μM. The average of this two values (C(average)) and the standard deviation are given in the Table. For some samples the average concentration was corrected by the dilution factor. The resulting concentration is referred to as C(dilution). Finally, ratio of the concentration of Mn in the sample (C(dilution)), and of the concentration of proteins in the sample (C(protein)), gives a concentration of Mn in the sample in nmol per mg of proteins.

**First set of samples**

Calibration curve: linear fit: h1= 335.45x; h2=359.67x

|             | Samples  | h1   | h2   | C(h1)         | C(h2)         | C(average)        | Std dev | C(dilution)   | C(protein)                | Mn          |
|-------------|----------|------|------|---------------|---------------|-------------------|---------|---------------|---------------------------|-------------|
|             |          |      |      | $\mu\text{M}$ | $\mu\text{M}$ | $\mu\text{M}$     |         | $\mu\text{M}$ | $\mu\text{g}/\mu\text{L}$ | nmol/mgprot |
|             |          |      |      | h1/335.45     | h2/359.67     | $[C(h1)+C(h2)]/2$ |         |               | C(dil.) $\cdot$ C(prot.)  |             |
| Replicate 1 | T        | 392  | 370  | 1.17          | 1.03          | 1.10              | 0.10    | 1.28          | 2.14                      | 0.60        |
|             | <u>2</u> | 5713 | 6231 | 17.03         | 17.32         | 17.18             | 0.21    | 20.04         | 6.54                      | 3.06        |
|             | <u>1</u> | 2932 | 3171 | 8.74          | 8.82          | 8.78              | 0.05    | 10.24         | 2.66                      | 3.85        |
| Replicate 2 | T        | 354  | 364  | 1.06          | 1.01          | 1.03              | 0.03    | 1.21          | 3.42                      | 0.35        |
|             | <u>2</u> | 2722 | 2910 | 8.11          | 8.09          | 8.10              | 0.02    | 9.45          | 5.15                      | 1.84        |
|             | <u>1</u> | 8054 | 8559 | 24.01         | 23.80         | 23.90             | 0.15    | 27.89         | 3.99                      | 6.98        |

**Second set of samples**

Calibration curve: linear fit: h1= 410.07x; h2=441.39x

|             | Samples  | h1    | h2    | C(h1)         | C(h2)         | C(average)        | Std dev | C(dilution)   | Cprotein                  | Mn          |
|-------------|----------|-------|-------|---------------|---------------|-------------------|---------|---------------|---------------------------|-------------|
|             |          |       |       | $\mu\text{M}$ | $\mu\text{M}$ | $\mu\text{M}$     |         | $\mu\text{M}$ | $\mu\text{g}/\mu\text{L}$ | nmol/mgprot |
|             |          |       |       | h1/410.07     | h2/441.39     | $[C(h1)+C(h2)]/2$ |         |               |                           |             |
| Replicate 3 | <u>2</u> | 13000 | 14100 | 31.70         | 31.94         | 31.82             | 0.17    | 31.82         | 13.8                      | 2.30        |
|             | <u>1</u> | 32580 | 34940 | 79.45         | 79.16         | 79.30             | 0.21    | 79.30         | 16.9                      | 4.68        |
|             | T        | 729   | 735   | 1.78          | 1.67          | 1.72              | 0.08    | 1.72          | 12.3                      | 0.14        |
| Replicate 4 | <u>2</u> | 6120  | 6501  | 14.92         | 14.73         | 14.83             | 0.14    | 14.83         | 9.0                       | 1.66        |
|             | <u>1</u> | 9390  | 10100 | 22.90         | 22.88         | 22.89             | 0.01    | 22.89         | 10.8                      | 2.13        |
|             | T        | 513   | 562   | 1.25          | 1.27          | 1.26              | 0.02    | 1.26          | 11.2                      | 0.11        |

Comparison of EPR and ICP-MS method:

Two replicate of compound 2 were analyzed by EPR and ICP-MS to compare the values obtained by these two methods. As can be seen from the values and the figure below, the only difference between the two methods is the higher standard deviation in the case of EPR.

**Mn content, nmol.mg<sup>-1</sup> protein**

|        | Replicate 1 | Replicate 2 | Average | standard deviation |
|--------|-------------|-------------|---------|--------------------|
| EPR    | 3,85        | 6,98        | 5,42    | 2,21               |
| ICP-MS | 5,66        | 5,92        | 5,79    | 0,19               |

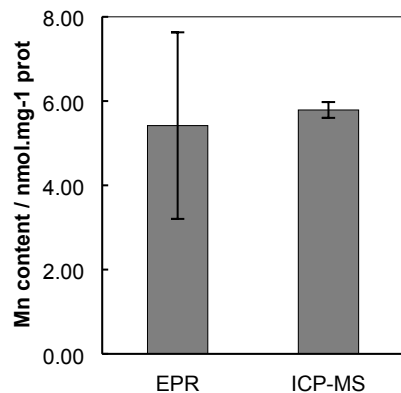

### *Quantification of Mn-complexes by ICP-MS in mitochondria-enriched fractions*

Cells were cultured in a 75 cm<sup>2</sup> flask to reach 90% confluency. They were incubated with compounds at the desired concentration for 6 hours, at 37 °C (at 100 µM for compound 1 in 2% DMSO for replicates 1-5 and in 0.02% DMSO for replicates 6-7). After a washing with 0.9% NaCl, a chaotropic shock was performed by washing the cells once with 1 M NaCl to remove charged species externally associated to the cells. Cells were washed twice with 0.9% NaCl. They were then harvested by scraping and centrifuged at 4 °C during 10 min at 800 rpm (replicates 1-5) or 900 rpm (replicates 6 and 7). The samples were diluted with 1 mL of milliQ water and protein content was determined for each sample using the Bradford assay.

Enriched mitochondria fraction was obtained as follows: cells were centrifuged at 4 °C during 5 min at 800 rpm, and the supernatant was removed. A Mitochondria Isolation Kit for cultured cells (Thermo Fisher Scientific, Waltham, Massachusetts, USA) was used, and three freezing/thawing cycles in liquid nitrogen were performed on isolated mitochondrial pellets.

Then, the samples were further diluted into 2% HNO<sub>3</sub> to obtain a final volume of 3 mL and were filtered (0.2 µm). A calibration curve was established using a Mn standard for ICP-MS in 2% HNO<sub>3</sub> to quantify the amount of manganese into the fractions. The data are reported in pmol per mg of proteins.

Seven independent experiments (in different cell passage) were performed, and are referred to as *Replicate 1-7*. ICP-MS analysis for *Replicate 1-2* was conducted on the same day, as well as *Replicate 3-5*, and *Replicate 6-7*. For *Replicates 1-5* each condition was tested in duplicate, which is indicated by *a*, or *b*. In total, 12 samples were analyzed for each condition considering all replicates.

#### REPLICATES 1 and 2

##### Calibration:

A stock solution of 0.06685 ppm of Mn in 2% HNO<sub>3</sub> was prepared from commercially available Mn standard for ICP-MS (1003 ppm) diluted in 2% HNO<sub>3</sub> solution. This stock solution was used to prepare the standards for the calibration curve, as listed in the Table below. For a given standard, the volume (in µL) of stock solution was diluted with the specified final volume of 2% HNO<sub>3</sub> solution in the Table below. The theoretical Mn concentration is indicated in ppb.

The calibration curve obtained is shown in the Figure below, and the corresponding data are reported in the Table. The counts number for Mn (CPS Mn) represents the average of 3 measurements, and the standard deviation is given (CPS RSD). The concentration determined from the linear fit is referred to as Mn exp. and is given in ppb.

##### **Standards Preparation**

|                       |          |               |               |               |               |               |               |
|-----------------------|----------|---------------|---------------|---------------|---------------|---------------|---------------|
| Mn/Re vol (µL)        | 0        | 12.5          | 25            | 125           | 250           | 500           | 1000          |
| Total vol (mL)        | 25.00    | 25.00         | 25.00         | 25.00         | 25.00         | 25.00         | 25.00         |
| <b>Mn theo. (ppb)</b> | <b>0</b> | <b>0.0334</b> | <b>0.0668</b> | <b>0.3342</b> | <b>0.6685</b> | <b>1.3370</b> | <b>2.6740</b> |

##### **Measurement by ICP-MS**

|                        |              |              |              |              |              |              |              |
|------------------------|--------------|--------------|--------------|--------------|--------------|--------------|--------------|
| CPS Mn                 | 48           | 98           | 318          | 1916         | 3929         | 8114         | 16736        |
| CPS RSD                | 236          | 84           | 67           | 7            | 8            | 5            | 3            |
| <b>55Mn exp. (ppb)</b> | <b>0.008</b> | <b>0.016</b> | <b>0.051</b> | <b>0.309</b> | <b>0.634</b> | <b>1.309</b> | <b>2.700</b> |

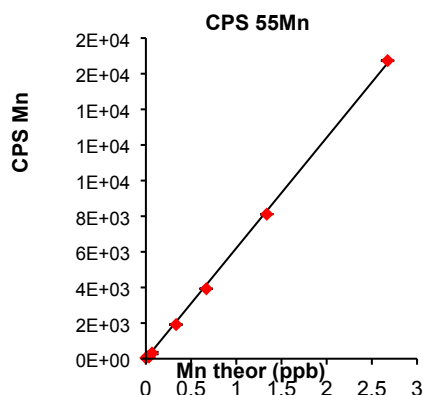

#### Determination of Mn total amount in mitochondria by ICP-MS

The samples prepared were further diluted by mixing 1 mL of sample with 2 mL of 2% HNO<sub>3</sub>. Each sample was measured in triplicate and counts value and standard deviation are listed in the table below. From the calibration curve the Mn concentrations in ppb in the diluted samples were determined. Using the total mass of each sample (mtot sample), the amount of Mn in ng, and in nmol was determined. This corresponds to the total amount of Mn in the mitochondrial fraction. This amount can be reported vs. the protein content using the determined protein concentration of the sample (Cprot), and the initial volume of the sample (1 mL).

|                                                      | <b>CPS</b>                 | <b>CPS Mn [He]</b> | <b>CPS RSD</b> |                        |                        |
|------------------------------------------------------|----------------------------|--------------------|----------------|------------------------|------------------------|
| <b>Mn counts number for each replicate</b>           | Replicate 1a <u>2</u> mito | 3060.424           | 7.0985         |                        |                        |
|                                                      | Replicate 1b <u>2</u> mito | 4376.756           | 5.7212         |                        |                        |
|                                                      | Replicate 2a <u>2</u> mito | 3480.512           | 10.1570        |                        |                        |
|                                                      | Replicate 2b <u>2</u> mito | 5427.114           | 4.0077         |                        |                        |
|                                                      | Replicate 1a <u>1</u> mito | 3210.454           | 4.2405         |                        |                        |
|                                                      | Replicate 1b <u>1</u> mito | 3830.632           | 4.7702         |                        |                        |
|                                                      | Replicate 2a <u>1</u> mito | 3564.552           | 6.8375         |                        |                        |
|                                                      | Replicate 2b <u>1</u> mito | 3906.626           | 9.5004         |                        |                        |
| <b>Conversion to ppb using the calibration curve</b> | <b>ppb (ng/g)</b>          | <b>Mn</b>          | <b>err</b>     | <b>mtot sample (g)</b> | <b>Dilution factor</b> |
|                                                      | Replicate 1a <u>2</u> mito | 0.493784           | 0.001145       | 3.0                    | 3                      |
|                                                      | Replicate 1b <u>2</u> mito | 0.706168           | 0.000923       | 3.0                    | 3                      |
|                                                      | Replicate 2a <u>2</u> mito | 0.561563           | 0.001639       | 3.0                    | 3                      |
|                                                      | Replicate 2b <u>2</u> mito | 0.875638           | 0.000647       | 3.0                    | 3                      |
|                                                      | Replicate 1a <u>1</u> mito | 0.517991           | 0.000684       | 3.0                    | 3.53                   |
|                                                      | Replicate 1b <u>1</u> mito | 0.618053           | 0.000770       | 3.0                    | 3.53                   |
|                                                      | Replicate 2a <u>1</u> mito | 0.575123           | 0.001103       | 3.0                    | 3.53                   |
| Replicate 2b <u>1</u> mito                           | 0.630314                   | 0.001533           | 3.0            | 3.53                   |                        |
| <b>Determination of the Mn mass in</b>               | <b>m (ng)</b>              | <b>Mn</b>          | <b>err</b>     |                        |                        |
|                                                      | Replicate 1a <u>2</u> mito | 4.44406            | 0.01031        |                        |                        |

|                                                                           |                            |           |              |                      |               |
|---------------------------------------------------------------------------|----------------------------|-----------|--------------|----------------------|---------------|
| <b>each sample</b>                                                        | Replicate 1b <u>2</u> mito | 6.35551   | 0.00831      |                      |               |
|                                                                           | Replicate 2a <u>2</u> mito | 5.05407   | 0.01475      |                      |               |
| ppb * mtot sample                                                         | Replicate 2b <u>2</u> mito | 7.88074   | 0.00582      |                      |               |
| * Dilution factor                                                         | Replicate 1a <u>1</u> mito | 5.48461   | 0.00724      |                      |               |
|                                                                           | Replicate 1b <u>1</u> mito | 6.54409   | 0.00815      |                      |               |
|                                                                           | Replicate 2a <u>1</u> mito | 6.08953   | 0.01168      |                      |               |
|                                                                           | Replicate 2b <u>1</u> mito | 6.67392   | 0.01623      |                      |               |
|                                                                           | <b>n (nmol)</b>            | <b>Mn</b> | <b>err</b>   | <b>Cprot (mg/mL)</b> | <b>V (mL)</b> |
|                                                                           | Replicate 1a <u>2</u> mito | 0.08089   | 0.00019      | 0.93                 | 1             |
|                                                                           | Replicate 1b <u>2</u> mito | 0.11569   | 0.00015      | 0.81                 | 1             |
|                                                                           | Replicate 2a <u>2</u> mito | 0.09200   | 0.00027      | 0.55                 | 1             |
| <b>Conversion to mole</b>                                                 | Replicate 2b <u>2</u> mito | 0.14345   | 0.00011      | 0.54                 | 1             |
|                                                                           | Replicate 1a <u>1</u> mito | 0.09983   | 0.00013      | 0.86                 | 1             |
|                                                                           | Replicate 1b <u>1</u> mito | 0.11912   | 0.00015      | 0.88                 | 1             |
|                                                                           | Replicate 2a <u>1</u> mito | 0.11084   | 0.00021      | 0.54                 | 1             |
|                                                                           | Replicate 2b <u>1</u> mito | 0.12148   | 0.00030      | 0.76                 | 1             |
|                                                                           | <b>C (pmol/mg prot)</b>    | <b>Mn</b> | <b>err</b>   |                      |               |
|                                                                           | Replicate 1a <u>2</u> mito | 87.0593   | 0.2019       |                      |               |
| <b>Determination of the Mn concentration reported vs. protein content</b> | Replicate 1b <u>2</u> mito | 142.5940  | 0.1864       |                      |               |
|                                                                           | Replicate 2a <u>2</u> mito | 166.7727  | 0.4867       |                      |               |
|                                                                           | Replicate 2b <u>2</u> mito | 265.3836  | 0.1960       |                      |               |
|                                                                           | Replicate 1a <u>1</u> mito | 116.4838  | 0.1539       |                      |               |
| n *1000 / (Cprot * V)                                                     | Replicate 1b <u>1</u> mito | 136.0145  | 0.1694       |                      |               |
|                                                                           | Replicate 2a <u>1</u> mito | 206.7890  | 0.3967       |                      |               |
|                                                                           | Replicate 2b <u>1</u> mito | 160.653   | 0.1318       |                      |               |
|                                                                           |                            | <b>Mn</b> | <b>stdev</b> |                      |               |
|                                                                           | Replicate 1 <u>2</u> mito  | 114.83    | 39.27        |                      |               |
| <b>Average for each replicate</b>                                         | Replicate 2 <u>2</u> mito  | 216.08    | 69.73        |                      |               |
|                                                                           | Replicate 1 <u>1</u> mito  | 126.25    | 13.81        |                      |               |
|                                                                           | Replicate 2 <u>1</u> mito  | 183.72    | 45.67        |                      |               |

### REPLICATES 3-5

#### Calibration:

A stock solution of 0.06685 ppm of Mn in 2% HNO<sub>3</sub> was prepared from commercially available Mn standard for ICP-MS (1003 ppm) diluted in 2% HNO<sub>3</sub> solution. This stock solution was used to prepare the standards for the calibration curve, as listed in the Table below. For a given standard, the volume (in  $\mu\text{L}$ ) of stock solution was diluted with the specified final volume of 2% HNO<sub>3</sub> solution in the Table below. The theoretical Mn concentration is indicated in ppb.

The calibration curve obtained is shown in the Figure below, and the corresponding data are reported in the Table. The counts number for Mn (CPS Mn) represents the average of 3 measurements, and the standard deviation is given (CPS RSD). The concentration determined from the linear fit is referred to as Mn exp. and is given in ppb.

#### Standards Preparation

|                          |          |               |               |               |               |               |               |               |
|--------------------------|----------|---------------|---------------|---------------|---------------|---------------|---------------|---------------|
| Mn vol ( $\mu\text{L}$ ) | 0        | 12.5          | 25            | 125           | 250           | 500           | 1000          | 1250          |
| Total vol (mL)           | 25.00    | 25.00         | 25.00         | 25.00         | 25.00         | 25.00         | 25.00         | 25.00         |
| <b>Mn theo. (ppb)</b>    | <b>0</b> | <b>0.0334</b> | <b>0.0669</b> | <b>0.3343</b> | <b>0.6687</b> | <b>1.3373</b> | <b>2.6747</b> | <b>3.3433</b> |

#### Measurement by ICP-MS

|                        |               |                |                |               |               |               |               |               |
|------------------------|---------------|----------------|----------------|---------------|---------------|---------------|---------------|---------------|
| CPS Mn                 | 52            | -373           | -54            | 2388          | 5423          | 11165         | 23016         | 28508         |
| CPS RSD                | 61            | -6             | -65            | 4             | 1             | 2             | 1             | 1             |
| <b>55Mn exp. (ppb)</b> | <b>0.0061</b> | <b>-0.0437</b> | <b>-0.0063</b> | <b>0.2803</b> | <b>0.6365</b> | <b>1.3106</b> | <b>2.7018</b> | <b>3.3464</b> |

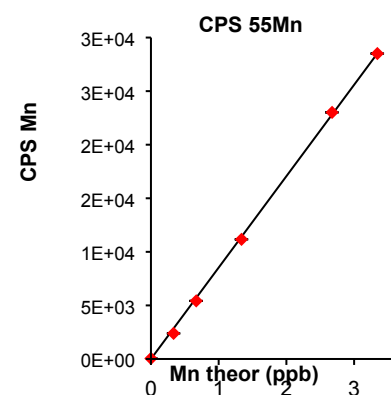

#### Determination of Mn total amount in mitochondria by ICP-MS

The samples prepared were further diluted by mixing 1 mL of sample with 2 mL of 2% HNO<sub>3</sub>. Each sample was measured in triplicate and counts value and standard deviation are listed in the table below. From the calibration curve the Mn concentrations in ppb in the diluted samples were determined. Using the total mass of each sample (mtot sample), the amount of Mn in ng, and in nmol was determined. This corresponds to the total amount of Mn in the mitochondrial fraction. This amount can be reported vs. the protein content using the determined protein concentration of the sample (Cprot), and the initial volume of the sample (1 mL).

|                                            | <b>CPS</b>                 | <b>CPS Mn [He]</b> | <b>CPS RSD</b> |
|--------------------------------------------|----------------------------|--------------------|----------------|
|                                            | Replicate 3a <u>2</u> mito | 11434.84           | 2.601656124    |
|                                            | Replicate 3b <u>2</u> mito | 18601.08           | 0.653053583    |
|                                            | Replicate 4a <u>2</u> mito | 13736.552          | 0.92291733     |
|                                            | Replicate 4b <u>2</u> mito | -                  | -              |
| <b>Mn counts number for each replicate</b> | Replicate 5a <u>2</u> mito | 11990.894          | 1.406861767    |
|                                            | Replicate 5b <u>2</u> mito | 22182.868          | 0.6509659      |
|                                            | Replicate 3a <u>1</u> mito | 17017.528          | 1.656177599    |
|                                            | Replicate 3b <u>1</u> mito | 24613.968          | 0.559436779    |
|                                            | Replicate 4a <u>1</u> mito | 16990.918          | 1.190079979    |
|                                            | Replicate 4b <u>1</u> mito | 17974.866          | 0.9895         |



|                            |           |             |
|----------------------------|-----------|-------------|
| Replicate 5a <u>1</u> mito | 21969.418 | 1.294834483 |
| Replicate 5b <u>1</u> mito | 15326.614 | 1.014792941 |

|                                               | ppb (ng/g)                 | Mn       | err      | mtot sample (g) | Dilution factor |
|-----------------------------------------------|----------------------------|----------|----------|-----------------|-----------------|
| Conversion to ppb using the calibration curve | Replicate 3a <u>2</u> mito | 1.342275 | 0.000305 | 3.0             | 3               |
|                                               | Replicate 3b <u>2</u> mito | 2.183482 | 0.000077 | 3.0             | 3               |
|                                               | Replicate 4a <u>2</u> mito | 1.612461 | 0.000108 | 3.0             | 3               |
|                                               | Replicate 4b <u>2</u> mito | -        | =        | 3.0             | 3               |
|                                               | Replicate 5a <u>2</u> mito | 1.407547 | 0.000165 | 3.0             | 3               |
|                                               | Replicate 5b <u>2</u> mito | 2.603929 | 0.000076 | 3.0             | 3               |
|                                               | Replicate 3a <u>1</u> mito | 1.997597 | 0.000194 | 3.0             | 3               |
|                                               | Replicate 3b <u>1</u> mito | 2.889303 | 0.000066 | 3.0             | 3               |
|                                               | Replicate 4a <u>1</u> mito | 1.994473 | 0.000140 | 3.0             | 3               |
|                                               | Replicate 4b <u>1</u> mito | 2.109974 | 0.000116 | 3.0             | 3               |
|                                               | Replicate 5a <u>1</u> mito | 2.578873 | 0.000152 | 3.0             | 3               |
|                                               | Replicate 5b <u>1</u> mito | 1.799110 | 0.000119 | 3.0             | 3               |

|                                             | m (ng)                              | Mn                         | err      |         |
|---------------------------------------------|-------------------------------------|----------------------------|----------|---------|
| Determination of the Mn mass in each sample | Replicate 3a <u>2</u> mito          | 12.08047                   | 0.00275  |         |
|                                             | Replicate 3b <u>2</u> mito          | 19.65133                   | 0.00069  |         |
|                                             | Replicate 4a <u>2</u> mito          | 14.51215                   | 0.00098  |         |
|                                             | Replicate 4b <u>2</u> mito          | -                          | -        |         |
|                                             | Replicate 5a <u>2</u> mito          | 12.66792                   | 0.00149  |         |
|                                             | Replicate 5b <u>2</u> mito          | 23.43536                   | 0.00069  |         |
|                                             | ppb * mtot sample * Dilution factor | Replicate 3a <u>1</u> mito | 17.97837 | 0.00175 |
|                                             | Replicate 3b <u>1</u> mito          | 26.00372                   | 0.00059  |         |
|                                             | Replicate 4a <u>1</u> mito          | 17.95026                   | 0.00126  |         |
|                                             | Replicate 4b <u>1</u> mito          | 18.98976                   | 0.00105  |         |
|                                             | Replicate 5a <u>1</u> mito          | 23.20986                   | 0.00137  |         |
|                                             | Replicate 5b <u>1</u> mito          | 16.19199                   | 0.00107  |         |

|                    | n (nmol)                   | Mn        | err       | Cprot (mg/mL) | V (mL) |
|--------------------|----------------------------|-----------|-----------|---------------|--------|
| Conversion to mole | Replicate 3a <u>2</u> mito | 0.2198929 | 0.0000500 | 1.65          | 1      |
|                    | Replicate 3b <u>2</u> mito | 0.3577002 | 0.0000126 | 1.45          | 1      |
|                    | Replicate 4a <u>2</u> mito | 0.2641550 | 0.0000177 | 1.40          | 1      |
|                    | Replicate 5a <u>2</u> mito | 0.2305858 | 0.0000271 | 0.99          | 1      |
|                    | Replicate 5b <u>2</u> mito | 0.4265783 | 0.0000125 | 0.95          | 1      |

|                                                                           |                            |           |              |      |   |
|---------------------------------------------------------------------------|----------------------------|-----------|--------------|------|---|
|                                                                           | Replicate 3a <u>1</u> mito | 0.3272484 | 0.0000318    | 1.36 | 1 |
|                                                                           | Replicate 3b <u>1</u> mito | 0.4733285 | 0.0000108    | 1.70 | 1 |
|                                                                           | Replicate 4a <u>1</u> mito | 0.3267367 | 0.0000229    | 1.41 | 1 |
|                                                                           | Replicate 4b <u>1</u> mito | 0.3456581 | 0.0000190    | 1.09 | 1 |
|                                                                           | Replicate 5a <u>1</u> mito | 0.4224736 | 0.0000249    | 1.20 | 1 |
|                                                                           | Replicate 5b <u>1</u> mito | 0.2947320 | 0.0000195    | 1.63 | 1 |
|                                                                           | <b>C (pmol/mg prot)</b>    | <b>Mn</b> | <b>err</b>   |      |   |
|                                                                           | Replicate 3a <u>2</u> mito | 133.5635  | 0.0304       |      |   |
|                                                                           | Replicate 3b <u>2</u> mito | 246.0577  | 0.0086       |      |   |
|                                                                           | Replicate 4a <u>2</u> mito | 188.8369  | 0.0127       |      |   |
| <b>Determination of the Mn concentration reported vs. protein content</b> | Replicate 4b <u>2</u> mito | -         | -            |      |   |
|                                                                           | Replicate 5a <u>2</u> mito | 233.4124  | 0.0274       |      |   |
|                                                                           | Replicate 5b <u>2</u> mito | 447.7775  | 0.0131       |      |   |
|                                                                           | Replicate 3a <u>1</u> mito | 240.0360  | 0.0234       |      |   |
| n *1000 / (Cprot * V)                                                     | Replicate 3b <u>1</u> mito | 279.0806  | 0.0063       |      |   |
|                                                                           | Replicate 4a <u>1</u> mito | 232.4709  | 0.0163       |      |   |
|                                                                           | Replicate 4b <u>1</u> mito | 318.0077  | 0.0175       |      |   |
|                                                                           | Replicate 5a <u>1</u> mito | 352.9491  | 0.0208       |      |   |
|                                                                           | Replicate 5b <u>1</u> mito | 180.3179  | 0.0427       |      |   |
|                                                                           |                            | <b>Mn</b> | <b>stdev</b> |      |   |
|                                                                           | Replicate 3 <u>2</u> mito  | 189.81    | 79.55        |      |   |
|                                                                           | Replicate 4 <u>2</u> mito  | 188.84    | -            |      |   |
| <b>Average for each replicate</b>                                         | Replicate 5 <u>2</u> mito  | 340.59    | 151.58       |      |   |
|                                                                           | Replicate 3 <u>1</u> mito  | 259.56    | 27.61        |      |   |
|                                                                           | Replicate 4 <u>1</u> mito  | 275.24    | 60.48        |      |   |
|                                                                           | Replicate 5 <u>1</u> mito  | 266.63    | 122.07       |      |   |

## REPLICATES 6 and 7

### Calibration:

A stock solution of 0.221 ppm of Mn in 2% HNO<sub>3</sub> was prepared by weighting 2 mg of commercially available Mn standard for ICP-MS (1003 ppm) and diluting it with 2% HNO<sub>3</sub> solution to a final mass of 9 998.3 mg. This stock solution was used to prepare the standards for the calibration curve, as listed in the Table below. For a given standard, the mass *m* of stock solution was diluted with 2% HNO<sub>3</sub> solution to the specified final mass, referred to as standard mass in the Table below. The theoretical Mn concentration is indicated in ppb.

The calibration curve obtained is shown in the Figure below, and the corresponding data are reported in the Table. The counts number for Mn (CPS Mn) represents the average of 3 measurements, and the standard deviation is given (CPS RSD). The concentration determined from the linear fit is referred to as Mn exp. and is given in ppb.

#### Standards Preparation

|                       |          |              |              |              |              |              |               |
|-----------------------|----------|--------------|--------------|--------------|--------------|--------------|---------------|
| Mn (mg)               | 0        | 10.4         | 50.5         | 101.5        | 499.1        | 1014.2       | 5031.7        |
| Total mass (g)        | 25       | 25.0036      | 25.0944      | 25.0166      | 24.9993      | 25.003       | 24.9797       |
| <b>Mn theo. (ppb)</b> | <b>0</b> | <b>0.092</b> | <b>0.444</b> | <b>0.895</b> | <b>4.406</b> | <b>8.952</b> | <b>44.455</b> |

#### Measurement by ICP-MS

|                      |              |              |              |              |              |              |               |
|----------------------|--------------|--------------|--------------|--------------|--------------|--------------|---------------|
| CPS Mn               | 35           | 669          | 3855         | 7850         | 38152        | 75839        | 375664        |
| CPS RSD              | 164          | 7            | 4            | 3            | 1            | 1            | 1             |
| <b>Mn exp. (ppb)</b> | <b>0.004</b> | <b>0.079</b> | <b>0.456</b> | <b>0.929</b> | <b>4.513</b> | <b>8.972</b> | <b>44.440</b> |

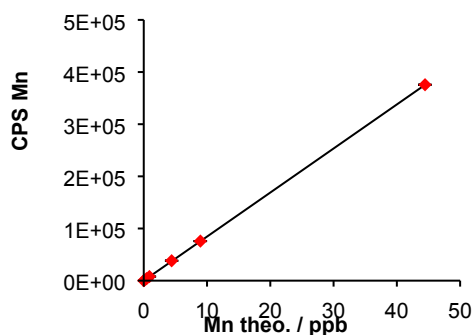

#### Determination of Mn total amount in mitochondria by ICP-MS:

Each sample was measured in triplicate and counts value and standard deviation are listed in the table below. From, the calibration curve the Mn concentrations in ppb in the diluted samples were determined. Using the total mass of each sample (mtot sample), the amount of Mn in ng, and in nmol was determined. This corresponds to the total amount of Mn in the mitochondrial fraction. This amount can be reported vs. the protein content using the determined protein concentration of the sample (Cprot), and the initial volume of the sample (1 mL).

|                                                      | CPS                       | CPS Mn                    | CPS RSD    |                        |               |
|------------------------------------------------------|---------------------------|---------------------------|------------|------------------------|---------------|
| <b>Mn counts number for each replicate</b>           | Replicate 6 <u>2</u> mito | 16665                     | 1          |                        |               |
|                                                      | Replicate 7 <u>2</u> mito | 10267                     | 1          |                        |               |
|                                                      | Replicate 6 <u>1</u> mito | 24642                     | 0          |                        |               |
|                                                      | Replicate 7 <u>1</u> mito | 8333                      | 2          |                        |               |
| <b>Conversion to ppb using the calibration curve</b> | <b>ppb (ng/g)</b>         | <b>Mn</b>                 | <b>err</b> | <b>mtot sample (g)</b> |               |
|                                                      | Replicate 6 <u>2</u> mito | 1.971                     | 2E-04      | 3.0072                 |               |
|                                                      | Replicate 7 <u>2</u> mito | 1.215                     | 1E-04      | 3.1491                 |               |
|                                                      | Replicate 6 <u>1</u> mito | 2.915                     | 5E-05      | 3.0053                 |               |
| <b>Determination of the Mn mass in each sample</b>   | <b>m (ng)</b>             | <b>Mn</b>                 | <b>err</b> |                        |               |
|                                                      | Replicate 6 <u>2</u> mito | 5.928                     | 5E-04      |                        |               |
|                                                      | Replicate 7 <u>2</u> mito | 3.825                     | 4E-04      |                        |               |
|                                                      | ppb * mtot sample         | Replicate 6 <u>1</u> mito | 8.761      | 1E-04                  |               |
| <b>Conversion to mole</b>                            | <b>n (nmol)</b>           | <b>Mn</b>                 | <b>err</b> | <b>Cprot (mg/mL)</b>   | <b>V (mL)</b> |
|                                                      | Replicate 6 <u>2</u> mito | 0.108                     | 9E-06      | 1.85                   | 1.0           |

|                                                                                                        |                           |           |            |      |     |
|--------------------------------------------------------------------------------------------------------|---------------------------|-----------|------------|------|-----|
|                                                                                                        | Replicate 7 <u>2</u> mito | 0.070     | 7E-06      | 2.21 | 1.0 |
|                                                                                                        | Replicate 6 <u>1</u> mito | 0.159     | 3E-06      | 1.78 | 1.0 |
|                                                                                                        | Replicate 7 <u>1</u> mito | 0.054     | 1E-05      | 1.64 | 1.0 |
|                                                                                                        | <b>C (pmol/mg prot)</b>   | <b>Mn</b> | <b>err</b> |      |     |
| <b>Determination of the Mn concentration reported vs. protein content</b><br><br>n *1000 / (Cprot * V) | Replicate 6 <u>2</u> mito | 56.79     | 5E-03      |      |     |
|                                                                                                        | Replicate 7 <u>2</u> mito | 31.64     | 3E-03      |      |     |
|                                                                                                        | Replicate 6 <u>1</u> mito | 88.59     | 1E-03      |      |     |
|                                                                                                        | Replicate 7 <u>1</u> mito | 33.73     | 7E-03      |      |     |

## SUMMARY FOR REPLICATES 1-7

|                                   |                           | <b>Mn</b> | <b>stdev</b> | <b>Mn ± SEM</b> |
|-----------------------------------|---------------------------|-----------|--------------|-----------------|
|                                   | Replicate 1 <u>2</u> mito | 114.83    | 39.27        | 162 ± 40        |
|                                   | Replicate 2 <u>2</u> mito | 216.08    | 69.73        |                 |
|                                   | Replicate 3 <u>2</u> mito | 189.81    | 79.55        |                 |
|                                   | Replicate 4 <u>2</u> mito | 188.84    | -            |                 |
|                                   | Replicate 5 <u>2</u> mito | 340.59    | 151.58       |                 |
|                                   | Replicate 6 <u>2</u> mito | 56.79     | -            |                 |
| <b>Average for each replicate</b> | Replicate 7 <u>2</u> mito | 31.64     | -            |                 |
| <b>pmol/mg prot</b>               | Replicate 1 <u>1</u> mito | 126.25    | 13.81        | 176 ± 36        |
|                                   | Replicate 2 <u>1</u> mito | 183.72    | 45.67        |                 |
|                                   | Replicate 3 <u>1</u> mito | 259.56    | 27.61        |                 |
|                                   | Replicate 4 <u>1</u> mito | 275.24    | 60.48        |                 |
|                                   | Replicate 5 <u>1</u> mito | 266.63    | 122.07       |                 |
|                                   | Replicate 6 <u>1</u> mito | 88.59     | -            |                 |
|                                   | Replicate 7 <u>1</u> mito | 33.73     | -            |                 |

### *Infra-red (IR) imaging of 1*

HT29-MD2 cells were seeded on silicon nitride windows (size: 5 mm x 5 mm, thickness: 500 nm) in 24-wells plate (75 000 cells/well). After 24 h, cells were incubated with 1 (100 µM, 0.02%DMSO) for 2 h at 37 °C. Cells were washed with 0.9% NaCl and a chaotropic shock was performed by washing the cells once with 1 M NaCl. They were then washed once with EDTA (50 mM), and twice with 0.9% NaCl. Cells were cryofixed in liquid ethane and freeze-dried. FTIR-SM images were taken with a 15X magnification 0.62 numerical aperture objective giving a field of view of 350×350 µm<sup>2</sup> and a projected pixel size of 5.5×5.5 µm<sup>2</sup> at standard magnification. The microscope was coupled to a Cary 660 spectrometer equipped with a KBr beamsplitter and a Michelson interferometer. Spectra were recorded at 8 cm<sup>-1</sup> resolution between 800 and 4000 cm<sup>-1</sup> with 256 co-added scans at 2.5 Hz mirror speed.

Fourier transform infrared spectromicroscopy (FTIR-SM) study of cryofixed and freeze-dried HT29-MD2 cells incubated with 1 was performed to detect the coordinated carbonyl moiety of 1 (Fig. S9). The A1 and E bands specific of the carbonyl moieties can be used to detect the complex,<sup>11-14</sup> which was successfully identified in cells, whereas no band was detected in control cells. The spatial resolution of this microscope is too low to determine a subcellular location of 1, however the

mapping of the A1-band integrated between 2055-2005  $\text{cm}^{-1}$  and the IR spectrum clearly show that cells incubated with **1** contain a  $\text{Re}(\text{CO})_3$  moiety.

#### *Synchrotron radiation X-ray fluorescence microscopy*

- APS synchrotron:

HT29-MD2 cells were seeded on silicon nitride windows (size: 5 mm x 5 mm, thickness: 500 nm) in 24-wells plate (75 000 cells/well). After 24 h, cells were incubated with **1** (100  $\mu\text{M}$ , 0.02%DMSO) for 2 h at 37 °C. Cells were washed with 0.9% NaCl and a chaotropic shock was performed by washing the cells once with 1 M NaCl. They were then washed once with EDTA (50 mM) when specified, and twice with 0.9% NaCl. Cells were cryofixed in liquid ethane and freeze-dried.

Mappings of intracellular manganese (Mn), potassium (K), phosphate (P), sulfur (S), zinc (Zn), iron (Fe), and rhenium (Re) were performed on the 2-ID-D beamline of Advanced Photon Source synchrotron (Argonne National Laboratory, Chicago, USA). Cells were located using a phase-contrast optical microscope. All measurements were conducted at room temperature. Excitation, 12.0 keV; integration time, 2 s  $\text{pixel}^{-1}$ ; pixel size, 200 nm.

Since the Zn K- $\alpha$  lines overlap with the Re L- $\alpha$  lines, spectral fitting was used to separate the XRF signal from the two elements. All the Zn K-lines (K- $\alpha$ , K- $\beta$ ) and the Re L-lines (L- $\alpha$ , L- $\beta$  L- $\gamma$ , L $\lambda$ , L $\nu$ ), together with their known branching ratios, were included in the fitting in order to better constrain the result. The elemental maps were calibrated using standards for each element, apart Re. For the latter, no standard is available, the concentration may thus vary by  $\pm 50\%$ . Quantification of element concentration per cell was performed with Image J software.<sup>15, 16</sup> For each cell a cell mask was determined using the sum of P and S maps. The sum of pixel intensities ( $\mu\text{g}\cdot\text{cm}^{-2}$ ) in the cell mask for a given element gave its concentration ( $\mu\text{g}\cdot\text{cm}^{-2}$ ).

- SOLEIL synchrotron:

HT29-MD2 cells were seeded on silicon nitride windows (size: 5 mm x 5 mm, thickness: 500 nm) in 24-wells plate (75 000 cells/well). After 24 h, cells were incubated with **1** (100  $\mu\text{M}$ , 0.02%DMSO) for 2 h at 37 °C. Mitotracker™ deep red (200 nM) was added 30 minutes before the end of the incubation. Cells were washed with 0.9% NaCl and a chaotropic shock was performed by washing the cells once with 1 M NaCl They were then washed once with EDTA (50 mM), and twice with 0.9% NaCl. Cells were cryofixed in liquid ethane and freeze-dried.

Confocal fluorescence images of Mitotracker™ deep red (ex 633 nm, em 645-750 nm) were recorded with open pinhole.

Mappings of intracellular manganese (Mn), potassium (K), phosphate (P), iron (Fe), and rhenium (Re) were performed on the Nanoscopium beamline,<sup>17</sup> of SOLEIL synchrotron (L'Orme des Merisiers Saint-Aubin, France). Cells were located using the optical microscope of the experimental station. In order to tailor the experimental conditions to the required high analytical sensitivity, the experiments were performed in the high flux operation mode of the beamline with  $\sim 10^{10}$  photons/s in the focused beam. The X-ray beam was focused by a Kirkpatrick-Baez nano-focusing mirror to  $0.3 \times 0.3 \mu\text{m}^2$  size at the sample position. For the maps the FLYSCAN continuous scanning mode was used with 300 nm image pixel-size.<sup>18</sup> The full XRF spectra were collected in each pixel by two Si-drift detectors (VITUS H50, KETEK GmbH) in order to increase the solid angle of detection. The XRF spectra of the two detectors were added and the sum was used for calculating the elemental maps. After generating the elemental maps, for a given element the pixel intensities were normalized to the maximum pixel intensity value of the map, and converted to 16 bits images using the software Octave.<sup>19</sup> As an example, the formula used to normalized the Fe map for a given cell and convert it to 16 bits image was:

$$\text{Fe}=\text{uint16}(\text{Fe}/\max(\text{Fe}(:)) * 2^{16});$$

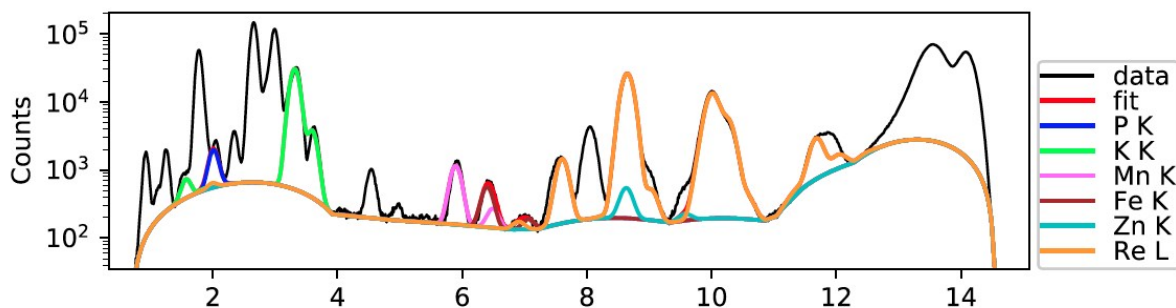

Mean spectrum of Figure S11 showing the deconvolution for the emission of P, K, Mn, Fe, Zn and Re, and the fit.

The Zn-K $\alpha$  and Re-L $\alpha$  (~8.6 keV) lines are overlapping. However, the good energy resolution of the XRF detectors of the Nanoscopium beamline ensures the unambiguous deconvolution of the Re-L $\beta$  lines (~10.15 and 10.28 keV). In order to avoid the eventual Zn and Re signal overlapping in the Re images, we used only the Re-L $\beta$  lines for creating the X-ray intensity maps.

All measurements were performed at room temperature with the experimental conditions of: monochromatic excitation energy 14.1 keV (**1**), or 9.9 keV (control cells); integration time, 2.4 s pixel<sup>-1</sup>; pixel size, 300 nm.

### Evaluation of the biological activity of Mn<sup>2+</sup>-complexes

#### *Cell activation with LPS and incubation with the compounds*

HT29-MD2 cells were seeded in 24 well-plates at 200 000 cells/well to reach 90% confluence after 3 or 4 days. Cells were incubated with media only, or the tested compounds at the desired concentration for 1 h. Then, LPS was added (0.1  $\mu$ g/mL, 6 hours). Supernatants were collected and stored at -20 °C before ELISA and LDH assay. Cells were washed with 0.9% NaCl, lysed in PBS containing 1% triton X-100 and protease inhibitors cocktail. They were harvested by scraping, and stored at -20 °C before western blot, cytotoxicity and protein quantification experiments

#### *Proteins concentration in cell lysate*

Protein concentrations were determined in cell lysates using bicinchoninic acid (BCA) protein assay reagents and bovine serum albumin (BSA) as standard according to the manufacturer's instructions.

#### *COX2 and SODs analysis*

Automated western blotting was performed on a WES automate (ProteinSimple, San Jose, CA) using a commercially available Wes 12-230 kDa Rabbit Master Kit (PS-MK01) and according to the instruction of the manufacturer. Samples of 5  $\mu$ L were prepared from cell lysate using a master mix kit (ProteinSimple) to obtain a final concentration of protein of 0.4 mg/mL. Proteins were separated by molecular weight by capillary electrophoresis. COX2, MnSOD and actin were detected using a solution containing the three primary antibodies (COX2 d 1:50, Sigma, SAB4200576; MnSOD d 1:25, SantaCruz Biotechnology, SC-30080; Actine d 1:1000, NOVUS, NB600-532), followed by a goat anti-rabbit HRP-conjugated secondary antibody (anti-rabbit) and a chemiluminescent substrate. Compass software (ProteinSimple) was used to analyze the data. The relative amount of each protein was calculated based on peak area and normalized to actin.

#### *IL8 quantification*

Levels of the pro-inflammatory cytokine IL8 produced by cells were determined in cell supernatants using a commercially available ELISA kit according to the instructions of the manufacturer. IL8 levels were normalized by the protein content determined in the corresponding cell lysates.

#### *Statistical analysis*

All data are represented as mean  $\pm$  SEM of n independent experiments and were tested for statistical significance using the Student's t test. Differences were considered significant when  $p < 0.05$

## 9. Supplementary Information References

1. J. M. McCord and I. Fridovich, *J. Biol. Chem.*, 1969, **244**, 6049-6055.
2. S. Durot, C. Policar, F. Cisnetti, F. Lambert, J.-P. Renault, G. Pelosi, G. Blain, H. Korri-Youssoufi and J.-P. Mahy, *Eur. J. Inorg. Chem.*, 2005, 3513-3523.
3. C. Policar, in *Redox Active Therapeutics*, eds. J. S. Reboucas, I. Batinic-Haberle, I. Spasojevic, D. S. Warner and D. St. Clair, Springer, 2016, ch. Chapter 17, pp. 125-164.
4. H. Y. V. Ching, I. Kenkel, N. Delsuc, E. Mathieu, I. Ivanović-Burmazović and C. Policar, *J. Inorg. Biochem.*, 2016, **160**, 172-179.
5. F. C. Friedel, D. Lieb and I. Ivanovic-Burmazovic, *J. Inorg. Biochem.*, 2012, **109**, 26-32.
6. B. Halliwell and J. M. C. Gutteridge, *Free radicals in biology and medicine* Oxford University Press, New York 2007.
7. F. Cisnetti, A. S. Lefevre, R. Guillot, F. Lambert, G. Blain, E. Anxolabéhère-Mallart and C. Policar, *Eur. J. Inorg. Chem.*, 2007, 4472-4480.
8. C. Lenoir, C. Sapin, A. H. Broquet, A.-M. Jouniaux, S. Bardin, I. Gasnereau, G. Thomas, P. Seksik, G. Trugnan, J. Masliah and M. Bachelet, *Life Sci.*, 2008, **82**, 519-528.
9. P. Seksik, H. Sokol, V. Grondin, C. Adrie, H. Duboc, B. Pigneur, G. Thomas, L. Beaugerie, G. Trugnan, J. Masliah and M. Bachelet, *Innate Immunity*, 2010, **16**, 381-390.
10. D. E. Ash and V. L. Schramm, *J. Biol. Chem.*, 1982, **257**, 9261-9264.
11. M. Salmain, A. Vessieres, G. Jaouen and I. S. Butler, *Anal. Chem.*, 1991, **63**, 2323-2329.
12. G. R. Stephenson, in *Bioorganometallics-Biomolecules, labeling, medicine*, ed. G. Jaouen, Wiley-VCH, Weinheim, 2006, pp. 215-262.
13. S. Clède and C. Policar, *Chem. Eur. J.*, 2015, **21**, 942-958.
14. S. Hostachy, C. Policar and N. Delsuc, *Coord. Chem. Rev.*, 2017, **351**, 172-188.
15. J. Schindelin, I. Arganda-Carreras, E. Frise, V. Kaynig, M. Longair, T. Pietzsch, S. Preibisch, C. Rueden, S. Saalfeld, B. Schmid, J.-Y. Tinevez, D. J. White, V. Hartenstein, K. Eliceiri, P. Tomancak and A. Cardona, *Nature Methods*, 2012, **9**, 676-682.
16. C. A. Schneider, W. S. Rasband and K. W. Eliceiri, *Nature methods*, 2012, **9**, 671-675.
17. A. Somogyi, K. Medjoubi, G. Baranton, V. Le Roux, M. Ribbens, F. Polack, P. Philippot and J. Samama, *J Synchrotron Radiat*, 2015, **22**, 1118-1129.
18. K. Medjoubi, N. Leclercq, F. Langlois, A. Buteau, S. Lé, S. Poirier, P. Mercère, M. Sforna, C. Kewish and A. Somogyi, *J Synchrotron Radiat*, 2013, **20**, 293-299.
19. J. W. Eaton, D. Bateman, S. Hauberg and R. Wehbring, *{GNU Octave} version 4.0.0 manual: a high-level interactive language for numerical computations*, 2015.
